# Supplementary material for: Genetic basis of pregnancy-associated decreased platelet counts and gestational thrombocytopenia
Source: PubMed Central journal article supplement — Blood. 2023 Dec 10;143(15):1528–38. doi: 10.1182/blood.2023021925 (PMC11033587; doi:10.1182/blood.2023021925), 2023-12-10
Supplement: BLOOD_BLD-2023-021925-mmc1.pdf [file BLOOD_BLD-2023-021925-mmc1.pdf]

## Table of contents

|                                                                                                                                                                                                         |    |
|---------------------------------------------------------------------------------------------------------------------------------------------------------------------------------------------------------|----|
| Supplementary Notes .....                                                                                                                                                                               | 3  |
| Supplementary Methods .....                                                                                                                                                                             | 6  |
| Supplementary Table Legends .....                                                                                                                                                                       | 14 |
| Supplementary Figures .....                                                                                                                                                                             | 16 |
| Figure S1. The distribution of platelet counts and the 0.5th and 2.5th percentiles during the first, second, and third trimesters, at delivery, and during the postpartum period from two cohorts. .... | 16 |
| Figure S2. QQ plots of GWAS meta-analyses of platelet count during pregnancy, at delivery, and during the postpartum period. ....                                                                       | 17 |
| Figure S3. The number of genome-wide significant loci and signals for the GWAS meta-analyses of platelet count during pregnancy, at delivery, and during the postpartum period. ....                    | 18 |
| Figure S4. The number of genome-wide significant loci and signals for platelet count during the first, second, and third trimesters. ....                                                               | 19 |
| Figure S5. Manhattan plots and QQ plots for GWAS of platelet count at delivery and during the postpartum period. ....                                                                                   | 20 |
| Figure S6. Comparing GWAS of platelet count during pregnancy, at delivery, and during the postpartum period of Longgang to Baoan. ....                                                                  | 21 |
| Figure S7. Regional association plots for novel loci of GWAS meta-analyses of platelet count during pregnancy, at delivery, and during the postpartum period. ....                                      | 22 |
| Figure S8. Comparing GWAS meta-analyses of platelet count during pregnancy, at delivery, and during the postpartum period to the GWAS summary statistics of platelet count in BBJ. ....                 | 24 |
| Figure S9. The result of co-localization between the GWAS of platelet count of the five periods of pregnancy and the platelet count in BBJ. ....                                                        | 25 |
| Figure S10. Regional association plots for five loci with the smallest PPH4 values in the co-localization analysis. ....                                                                                | 27 |
| Figure S11. Distribution of the number of repeated measurements of platelet counts in Baoan and Longgang. ....                                                                                          | 28 |
| Figure S12. TrajGWAS results of the mean of longitudinal platelet count during pregnancy and the postpartum period. ....                                                                                | 29 |
| Figure S13. TrajGWAS results of the within-subject variability of longitudinal platelet counts during pregnancy and the postpartum period. ....                                                         | 30 |
| Figure S14. Receiver operating characteristic (ROC) curves of 8 models for GT. ....                                                                                                                     | 31 |

|                                                                                                                                                 |           |
|-------------------------------------------------------------------------------------------------------------------------------------------------|-----------|
| <b>Figure S15. Regional association plots and LD heatmap of GT in <i>PEAR1</i> locus.....</b>                                                   | <b>32</b> |
| <b>Figure S16. Regional association plots for novel loci of GWAS meta-analyses of GT. ....</b>                                                  | <b>35</b> |
| <b>Figure S17. Regional association plots of rs12041331 and rs12276986 for platelet count at delivery and during the postpartum period.....</b> | <b>36</b> |
| <b>Figure S18. Mean platelet counts over gestation age.....</b>                                                                                 | <b>37</b> |
| <b>Figure S20. Mean platelet volumes over gestation age.....</b>                                                                                | <b>39</b> |
| <b>Figure S23. TrajGWAS results of the mean of longitudinal MPV during pregnancy and the postpartum period.....</b>                             | <b>43</b> |
| <b>Figure S24. TrajGWAS results of the within-subject variability of longitudinal MPV during pregnancy and the postpartum period.....</b>       | <b>44</b> |

## 1 **Supplementary Notes**

### 2 **Factors influencing GT during pregnancy**

3 We primarily focused on prenatal screening indicators readily obtainable during the first trimester,  
4 such as BMI, SBP, and DBP. We also compared the mode of conception within severe GT cases,  
5 mild GT cases, and control pregnancies. Several early pregnancy factors were associated with the  
6 mean platelet and GT during pregnancies. The age of severe GT was higher than mild GT and  
7 controls (both  $P < 2.2 \times 10^{-16}$ ). The difference in BMI, SBP, and DBP of the first trimester among  
8 control, mild GT, and severe GT was relatively small but statistically significant. There were more  
9 pregnancies conceived with in vitro fertilization in the two GT groups (mild GT: 4.5%,  $P = 0.011$ ,  
10 and severe GT: 5.6%,  $P = 0.031$ ) (**Table S1**).

11

### 12 **Maternal and neonatal pregnancy outcomes of GT**

13 We compared maternal and neonatal outcomes among control and GT pregnancies (**Table S23**).  
14 The proportion of twin pregnancies was significantly higher among patients with both mild GT  
15 (5.1%,  $P = 8.12 \times 10^{-18}$ ) and severe GT (9.3%,  $P = 2.17 \times 10^{-20}$ ) when compared to controls (3.3%),  
16 which is consistent with previous reports<sup>1</sup>. The median gestational age at delivery was consistent  
17 across the three groups, at 276 days (39+3 weeks). Additionally, pregnant women with GT had a  
18 higher rate of cesarean section deliveries in comparison to pregnancies in the control group (mild  
19 GT:  $P = 2.23 \times 10^{-4}$ , severe GT:  $P = 2.65 \times 10^{-7}$ ). Notably, the risk of postpartum hemorrhage was  
20 2.03 and 3.71 times higher in mild GT and severe GT cases compared to controls ( $P = 3.12 \times 10^{-8}$   
21 and  $P = 3.20 \times 10^{-5}$ , respectively), in line with previous studies<sup>2,3</sup>. A lower proportion of  
22 spontaneous preterm birth and stillbirth were observed among pregnant women with mild GT  
23 (2.4%,  $P = 5.04 \times 10^{-8}$ ; 0.4%,  $P = 0.032$ ). It should be noted that these unexpected observations  
24 may be attributable to relatively smaller sample sizes for both of these pathological pregnancy  
25 outcomes. Neonatal birth length and weight in pregnancies with mild GT were slightly higher than  
26 in the control group (both  $P < 2.2 \times 10^{-16}$ ), which may be attributed to potential confounding  
27 factors.

28

29 **Platelet counts change during pregnancy in GT pregnancies with platelet count**  
30 **measurements at all five periods**

31 We conducted a sensitivity analysis where we focused on 14,712 pregnancies from the two  
32 hospital cohorts who had platelet count measurements at all five periods. The tendency of changes  
33 in mean platelet count is similar to the primary analysis, exhibiting a gradual decrease throughout  
34 gestation, reaching the lowest at delivery, and subsequently recovering during the postpartum  
35 period (**Figure S18 and Table S24**). Furthermore, pregnancies diagnosed with GT had a larger  
36 declining percentage and a faster mean decline rate of platelet count compared with controls  
37 (**Table S3B**), which increased with the severity of GT and maximized among the severe GT group  
38 ( $P = 0.001$  and  $P = 0.001$ ).

39

40 **Changes in individual platelet count**

41 To investigate the changes in individual platelet count, we used an R package traj ([https://cran.r-](https://cran.r-project.org/web/packages/traj/index.html)  
42 [project.org/web/packages/traj/index.html](https://cran.r-project.org/web/packages/traj/index.html)) to describe individual changes in platelet count. It is  
43 based on a three-step procedure proposed by Leffondree et al.<sup>4</sup> to cluster individual longitudinal  
44 trajectories. We chose pregnant women who had platelet count measurements at all five periods  
45 and conducted the following analysis separately in the control, mild GT, and severe GT groups:  
46 (1) computing 24 measures of change to describe the individual longitudinal trajectories; (2)  
47 performing a factor analysis for the 24 measures to select the most relevant measures; (3)  
48 performing a cluster analysis to classify individuals into different clusters according to the  
49 measures selected from step 2. The measures selected from Step 2 for each group are presented in  
50 **Table S25**. We set the number of clusters as 3. To illustrate individual changes in platelet count,  
51 we also randomly sampled 10 individuals from each cluster.

52

53 **Table S25.** The measures best captured the main features of the trajectories of platelet count in the  
 54 5 periods in different pregnant women group

| Group            | Measures of changes                                                                |
|------------------|------------------------------------------------------------------------------------|
| <b>Severe GT</b> | Change (the difference between the last and the first y),                          |
|                  | SD of the first differences,                                                       |
|                  | Ratio of the mean absolute second difference to the mean absolute first difference |
| <b>Mild GT</b>   | Change relative to the mean-over-time,                                             |
|                  | Mean of the absolute first differences,                                            |
|                  | Ratio of the mean absolute second difference to the mean absolute first difference |
| <b>Control</b>   | Mean-over-time,                                                                    |
|                  | Change relative to the mean-over-time,                                             |
|                  | Maximum of the absolute first differences,                                         |
|                  | Ratio of the mean absolute second difference to the mean absolute first difference |

55

56 As shown in **Figure S19**, pregnancies in Cluster 1 experienced a sharp decrease in platelet count  
 57 during pregnancy and recovered to nearly the level of the first trimester during the postpartum  
 58 period; the platelet count of pregnancies in Cluster 2 dropped dramatically during pregnancy but  
 59 moderately increased during the postpartum period; and the platelet count of pregnancies in  
 60 Cluster 3 were in little change during the whole pregnancy and postpartum period. All three  
 61 clusters showed the tendency for platelet count to constantly decline during pregnancy but recover  
 62 after delivery. To illustrate individual changes in platelet count, we also randomly sampled 10  
 63 individuals from each cluster (**Figure S19**).

64

65 **Phenotypic analysis and genome-wide association studies on mean platelet volume (MPV)**  
 66 **during pregnancy, at delivery and during the postpartum period**

67 To further understand if *PEAR1* may be related to platelet activation, we conducted an additional  
 68 phenotypic and GWAS analysis with MPV during the five periods as a larger MPV is attributed to  
 69 an increased platelet turnover<sup>5</sup> and is associated with increased platelet activation<sup>6</sup>.

70 Consistent with previous research findings<sup>7,8</sup>, we observed an inverse correlation between  
 71 mean platelet volume (MPV) and platelet count. The MPV of all pregnant women increased  
 72 throughout pregnancy and decreased after delivery (**Figure S20**).

73 We further conducted GWAS for MPV at the first, second, and third trimesters during  
 74 pregnancy among 71,605 Chinese pregnant women, and identified 138 independent genome-wide

75 significant loci (187 signals) (**Figure S21; Table S25**). GWAS for MPV at delivery and  
76 postpartum revealed 39 loci (46 signals) and 82 loci (89 signals), respectively.

77 We also identified two loci of MPV with time-dependent genetic effects. Interestingly, one of  
78 these loci is in the *PEAR1* locus (**Figure S22A; Table S12**). The genetic effect (absolute value) of  
79 rs12041331-A allele on MPV from the first trimester to the third trimester experiences a notable  
80 increase (3.91-fold). This trend aligns with the findings from the analysis of platelet count.

81 The TrajGWAS outcomes evaluating genetic variants affecting the mean of MPV across  
82 pregnancies coincided with the trimester-specific MPV GWAS results (**Figure S23A, C; Table  
83 S26 and S27**). Notably, SNPs associated with MPV changes during pregnancy, demonstrated  
84 consistent and significant associations within the *PEAR1* locus at 1q23.1 across both hospital  
85 cohorts (**Figure S24A, C; Table S28 and S29**). The lead SNP rs12566888-G allele in each cohort  
86 (Longgang:  $\beta=0.19$ ,  $\tau = 0.08340$ ,  $P = 4.19 \times 10^{-9}$  and Baoan:  $\beta=0.19$ ,  $\tau = 0.0836$ ,  $P = 3.68 \times 10^{-$   
87  $^{10}$ ) was associated with a faster increase in MPV throughout pregnancy and the postpartum period.  
88

## 89 **Supplementary Methods**

### 90 **Study population**

91 Between 2017 and 2022, a total of 121,687 Chinese pregnant women who participated in a  
92 pregnancy screening program at two hospital cohorts in Shenzhen, China, were enrolled in our  
93 study. The Longgang cohort consists of 70,739 pregnancies from Longgang District Maternity and  
94 Child Healthcare Hospital of Shenzhen City. The Baoan cohort consists of 50,948 pregnancies  
95 from Shenzhen Baoan Women's and Children's Hospital. To ensure sample accuracy, we excluded  
96 5,625 pregnancies potentially involving multiple gestations during the study period, as well as  
97 15,947 pregnancies for which platelet count results were unavailable.

98 The research design is summarized in **Figure 1**, and the characteristics of the participants are  
99 presented in **Table S1**.

100 This study was approved by the Medical Ethics Committee of the School of Public Health  
101 (Shenzhen), Sun Yat-sen University, Longgang District Maternity and Child Healthcare Hospital

102 of Shenzhen City, and Shenzhen Baoan Women's and Children's Hospital. Data collection was  
103 approved by the Human Genetic Resources Administration of China (HGRAC).

104

#### 105 **Phenotype definition**

106 In the GWAS analyzing platelet count throughout the first, second, and third trimesters, we  
107 selected the earliest platelet count measurement within each trimester. Platelet count at delivery  
108 was determined by considering platelet count results within 24 hours prior to delivery. If multiple  
109 platelet count measurements were available at delivery and during the postpartum period, the  
110 mean platelet count was calculated.

111 As for GWAS of GT, to eliminate thrombocytopenia caused by other conditions, pregnancies  
112 with preeclampsia, HELLP syndrome (hemolysis, elevated liver enzymes, and low platelet count),  
113 primary immune thrombocytopenia, HIV infection, hepatitis B virus, and hepatitis C virus  
114 infection were excluded from both the GT cases and controls. As GT typically does not lead to  
115 severe thrombocytopenia<sup>9,10</sup>, pregnant women with one or more platelet counts less than  $50 \times 10^9/L$   
116 during pregnancy were also excluded. According to the inclusion and exclusion criteria, 6,839 and  
117 5,230 pregnancies were excluded for GT and severe GT, respectively, and we obtained 11,138 GT  
118 cases and 85,294 controls, 906 severe GT cases and 97,283 controls.

119

#### 120 **Imputation**

121 Imputation of autosomal chromosomes and the X chromosome for the two hospital cohorts was  
122 carried out using GLIMPSE (version 1.1.1) with default parameters according to the GLIMPSE  
123 tutorial documentation<sup>11</sup>. The reference panel utilized was from the Born in Guangzhou Cohort  
124 Study (BIGCS) (<http://gdbig.bigcs.com.cn/>), resulting in 12,910,816 bi-allelic SNPs with a MAF  
125  $\geq 0.001$ .

126

#### 127 **Variant annotation**

128 Variant annotation was conducted using Ensembl Variant Effect Predictor (VEP)<sup>12</sup> (version 101),  
129 with indexed GRCh38 cache files (version 109). HGVS notations were generated by primary

130 assembled reference FASTA files for *Homo sapiens*. All of these data used for annotation were  
131 pre-downloaded from the Ensembl FTP server (<https://ftp.ensembl.org/pub/>). As a variant may  
132 overlap multiple transcripts, we used --pick options to assign one block of consequence for each  
133 variant based on a set of VEP default criteria. The --nearest option was used to identify the nearest  
134 gene with a protein-coding transcription start site (TSS) for variants located in the intergenic  
135 region.

136

### 137 **Statistical analyses**

138 We used the Kruskal-Wallis test to compare age, BMI, SBP, and DBP of the first trimester,  
139 gestation age at delivery, newborn birth length and birth weight, and Chi-squared test or Fisher's  
140 exact test to compare mode of conception, mode of delivery, the proportion of fetal sex, twin  
141 pregnancy, spontaneous preterm birth and stillbirth among controls, mild GT cases, and severe GT  
142 cases. The Jonckheere-Terpstra test was conducted with the R package clinfun (version 1.1.1)  
143 (<https://cran.r-project.org/web/packages/clinfun/index.html>). The linear mixed model was  
144 implemented using the R package lmerTest<sup>13</sup> (version 3.1-3) ([https://cran.r-](https://cran.r-project.org/web/packages/lmerTest/index.html)  
145 [project.org/web/packages/lmerTest/index.html](https://cran.r-project.org/web/packages/lmerTest/index.html)).

146

### 147 **LD score regression**

148 The linkage disequilibrium (LD) score intercepts and  $\lambda_{GC}$  were calculated using the LD score  
149 (LDSC<sup>14</sup>) regression to distinguish inflation between polygenicity and confounding bias. We also  
150 conducted LDSC<sup>15</sup> regression to estimate SNP-based heritability and genetic correlations ( $r_g$ )  
151 between 5 quantitative traits (platelet count during the first, second, and third trimesters, at  
152 delivery, and during the postpartum period) and 2 qualitative traits (GT and severe GT).

153

### 154 **Selection of proxy SNPs to conduct external replication**

155 If our lead SNP was not present in the BBJ GWAS summary statistics, a proxy SNP in the BBJ data with  
156 LD  $R^2 > 0.8$  was used as a substitute. Proxy SNPs were queried using the LDproxy Tool through LDlink<sup>16</sup>  
157 5.5.1 release (11/15/2022) based on GRCh37 1000G genome build in CHB and CHS populations.



158

### 159 **Identification of novel locus and signal**

160 We downloaded all associations (v1.0.2\_e109\_r2023-02-15) from GWAS Catalog<sup>17</sup> to identify  
161 novel associated SNPs. Novel locus was defined as no SNPs reported to be associated with  
162 platelet count in the GWAS Catalog within the  $\pm 500\text{kb}$  block of the SNP. If there were variants  
163 reported as associated with platelet count in the GWAS Catalog within  $\pm 500\text{kb}$  of the SNP, and  
164 the LD  $R^2$  between the SNP and the previously reported variant was less than 0.2, this SNP was  
165 defined as a novel signal.

166 The LD  $R^2$  between the genome-wide significant independent SNP in our studies and  
167 variants reported in GWAS Catalog was calculated using the LDpair Tool through LDlink<sup>16</sup> 5.5.1  
168 release (11/15/2022) based on GRCh38 1000G genome build in the EAS and EUR populations.

169

### 170 **Co-localization analysis**

171 For GWAS of platelet counts in BBJ, we selected the same region of SNPs as of pregnant women  
172 (the  $\pm 500\text{kb}$  block of lead SNPs), and only SNPs in these two GWAS summary statistics were  
173 included in co-localization analyses. We set the prior probability of an SNP associated with  
174 platelet counts of pregnant women ( $p_1$ ) and in BBJ ( $p_2$ ) as  $1 \times 10^{-4}$ , and the prior probability of an  
175 SNP associated with both traits ( $p_{12}$ ) as  $5 \times 10^{-6}$ <sup>18</sup>. We defined a locus successfully co-localized  
176 when the posterior probability that both traits are associated and share a single causal variant  
177 (PPH4)  $\geq 0.8$ . We also extracted a 95% credible set of each locus with accumulated SNP PPH4  $\geq$   
178 0.95.

179

### 180 **TrajGWAS analyses**

181 TrajGWAS<sup>19</sup> is a recently developed method based on a mixed-effects location scale model,  
182 which can implement GWAS of longitudinal biomarkers and identify variants that contribute to  
183 mean or within-subject variability of biomarkers. Ko et al. interpreted within-subject variability as  
184 fluctuation of the biomarker for an individual around its mean.

185 According to the pipeline described by Ko et al.<sup>19</sup>, we first conducted the score test across all  
186 of the SNPs with  $MAF \geq 0.01$  and obtained the direction of effect ( $\beta$  or  $\tau$ ) and  $P$  values affecting  
187 the mean and within-subject variability of platelet count. Then we performed the Wald test on the  
188 SNPs with  $P$  values less than  $5 \times 10^{-8}$  to estimate the effect size.

189 TrajGWAS analyses were carried out with a Julia package TrajGWAS.jl<sup>19</sup>  
190 (<https://github.com/OpenMendel/TrajGWAS.jl>). Manhattan plots and QQ plots in **Supplementary**  
191 **Figures 7 and 8** were plotted using a Julia package MendelPlots.jl<sup>20</sup>  
192 (<https://github.com/OpenMendel/MendelPlots.jl>).

193 We used PLINK<sup>21</sup> (version 1.9) ([www.cog-genomics.org/plink/1.9/](http://www.cog-genomics.org/plink/1.9/)) --clump to identify  
194 independent significant loci. Variants within 1Mb from the lead SNP and with LD  $R^2$  larger than  
195 0.01 were divided into one clump.

196

### 197 **Polygenic risk score**

198 An independent NIPT PLUS pregnancy cohort was used to train the polygenic risk scores (PRSs)  
199 model of platelet counts during the first, second, and third trimesters. Between 2020 and 2021,  
200 5,733 pregnant women who participated in the pregnancy screening program from Shenzhen  
201 Baoan Women's and Children's Hospital were recruited, all received Non-Invasive Prenatal  
202 Testing (NIPT) and provided written informed consent. These participants are characterized by a  
203 deeper sequencing depth in comparison to conventional NIPT. The genotyping and quality control  
204 processes of NIPT PLUS cohort participants were the same as Baoan and Longgang. 4,642  
205 pregnant women with at least one platelet count testing result were included in the following  
206 derivation and validation of PRSs.

207 We used our meta-analysis of GWAS summary statistics for platelet counts of the first, second,  
208 and third trimesters during pregnancy (base GWAS data) to obtain the effect size of association  
209 SNPs. The PRSs were derived in NIPT PLUS (target data). The target data was randomly divided  
210 into the training (80%) and testing sets (20%). To obtain robust model estimates, we implemented  
211 a 10-fold cross-validation in the training set. The original training set was randomly divided into 10  
212 subgroups, one subgroup was set as a validation set (10%) and the remaining 9 subgroups were set

213 as a new training set (90%). The new training set was used to derive PRSs. We evaluated the  
214 performance of the PRS of each period during pregnancy on the platelet count of the corresponding  
215 period by linear regression in the validation set. After changing the validation set in turn and  
216 repeating the process 9 times, we selected the optimal PRS (with the highest explained phenotypic  
217 variance ( $R^2$ )) and reported the threshold of  $P$  value. We then performed linear regression on platelet  
218 count using the optimal PRS in the testing set and reported adjusted- $R^2$  of PRS and Spearman rank  
219 correlation coefficient ( $r_s$ ). We also adjusted for the top 10th principal component, maternal age,  
220 and gestation age corresponding to the time of the platelet count measurement, and reported the  $r_s$   
221 and adjusted- $R^2$  of covariate models and the combined models. Similar to the aforementioned  
222 approach, we also constructed the optimal PRS for GT. To assess the ability of (1) the optimal PRS  
223 of GT, (2) the optimal PRS of platelet count during the first, second, and third trimesters, (3) the  
224 optimal PRS of GT combined with the three optimal PRSs of platelet count, (4) the optimal PRS of  
225 GT combined with the three optimal PRSs of platelet count and covariates to predict GT, we  
226 performed logistic regression in the testing set of GT and reported the C-statistics of the receiver  
227 operating characteristic (ROC) curve and Nagelkerke  $R^2$ .

228 We used the genome-wide clumping and thresholding (C+T) method implemented in  
229 PRSice-2<sup>22</sup> to construct PRSs for platelet counts of the 5 periods during pregnancy and GT. The  
230 distance for clumping was set within  $\pm 500$ kb of lead SNP, and the threshold of LD  $R^2$  was 0.2.  
231 The LD  $R^2$  was calculated on our reference panel BIGCS. The  $P$ -value threshold was  
232 systematically varied, commencing at  $5 \times 10^{-8}$  and incremented by  $5 \times 10^{-5}$  in each step, until  
233 reaching the values of 0.5 and 1, in order to ascertain the optimal  $P$ -value threshold.  
234

235 **Reference:**

- 236 1. Fogerty AE, Dzik W. Gestational thrombocytopenia: a case-control study of over 3,500 pregnancies.  
237 *Br J Haematol.* 2021;194(2):433-438.
- 238 2. Carlson LM, Dotters-Katz SK, Smid MC, Manuck TA. How Low Is Too Low? Postpartum  
239 Hemorrhage Risk among Women with Thrombocytopenia. *Am J Perinatol.* 2017;34(11):1135-1141.
- 240 3. Govindappagari S, Moyle K, Burwick RM. Mild Thrombocytopenia and Postpartum Hemorrhage  
241 in Nulliparous Women With Term, Singleton, Vertex Deliveries. *Obstet Gynecol.* 2020;135(6):1338-  
242 1344.
- 243 4. Leffondré K, Abrahamowicz M, Regeasse A, et al. Statistical measures were proposed for  
244 identifying longitudinal patterns of change in quantitative health indicators. *J Clin Epidemiol.*  
245 2004;57(10):1049-1062.
- 246 5. Martin JF, Trowbridge EA, Salmon G, Plumb J. The biological significance of platelet volume: its  
247 relationship to bleeding time, platelet thromboxane B2 production and megakaryocyte nuclear DNA  
248 concentration. *Thromb Res.* 1983;32(5):443-460.
- 249 6. Tsiara S, Elisaf M, Jagroop IA, Mikhailidis DP. Platelets as predictors of vascular risk: is there a  
250 practical index of platelet activity? *Clin Appl Thromb Hemost.* 2003;9(3):177-190.
- 251 7. Thompson C, Jakubowski J. The pathophysiology and clinical relevance of platelet heterogeneity.  
252 *Blood.* 1988;72(1):1-8.
- 253 8. Tygart SG, McRoyan DK, Spinnato JA, McRoyan CJ, Kitay DZ. Longitudinal study of platelet  
254 indices during normal pregnancy. *Am J Obstet Gynecol.* 1986;154(4):883-887.
- 255 9. ACOG Practice Bulletin No. 207: Thrombocytopenia in Pregnancy. *Obstet Gynecol.*  
256 2019;133(3):e181-e193.
- 257 10. Cines DB, Levine LD. Thrombocytopenia in pregnancy. *Blood.* 2017;130(21):2271-2277.
- 258 11. Rubinacci S, Ribeiro DM, Hofmeister RJ, Delaneau O. Efficient phasing and imputation of low-  
259 coverage sequencing data using large reference panels. *Nat Genet.* 2021;53(1):120-126.
- 260 12. McLaren W, Gil L, Hunt SE, et al. The Ensembl Variant Effect Predictor. *Genome Biol.*  
261 2016;17(1):122.
- 262 13. Kuznetsova A, Brockhoff PB, Christensen RH. lmerTest package: tests in linear mixed effects  
263 models. *Journal of statistical software.* 2017;82:1-26.
- 264 14. Bulik-Sullivan BK, Loh PR, Finucane HK, et al. LD Score regression distinguishes confounding  
265 from polygenicity in genome-wide association studies. *Nat Genet.* 2015;47(3):291-295.
- 266 15. Bulik-Sullivan B, Finucane HK, Anttila V, et al. An atlas of genetic correlations across human  
267 diseases and traits. *Nat Genet.* 2015;47(11):1236-1241.
- 268 16. Machiela MJ, Chanock SJ. LDlink: a web-based application for exploring population-specific  
269 haplotype structure and linking correlated alleles of possible functional variants. *Bioinformatics.*  
270 2015;31(21):3555-3557.
- 271 17. Buniello A, MacArthur JAL, Cerezo M, et al. The NHGRI-EBI GWAS Catalog of published  
272 genome-wide association studies, targeted arrays and summary statistics 2019. *Nucleic Acids Res.*  
273 2019;47(D1):D1005-d1012.
- 274 18. Wallace C. Eliciting priors and relaxing the single causal variant assumption in colocalisation  
275 analyses. *PLoS Genet.* 2020;16(4):e1008720.
- 276 19. Ko S, German CA, Jensen A, et al. GWAS of longitudinal trajectories at biobank scale. *Am J Hum*

277 *Genet.* 2022;109(3):433-445.

278 20. Zhou H, Sinsheimer JS, Bates DM, et al. OPENMENDEL: a cooperative programming project for  
279 statistical genetics. *Hum Genet.* 2020;139(1):61-71.

280 21. Chang CC, Chow CC, Tellier LC, Vattikuti S, Purcell SM, Lee JJ. Second-generation PLINK: rising  
281 to the challenge of larger and richer datasets. *Gigascience.* 2015;4:7.

282 22. Choi SW, O'Reilly PF. PRSice-2: Polygenic Risk Score software for biobank-scale data.  
283 *Gigascience.* 2019;8(7).

284

285

286 **Supplementary Table Legends**

287 **Table S1. Demographic and clinical characteristics of mild GT cases, severe GT cases, and**  
288 **controls during pregnancy**

289

290 **Table S2. The parameter estimation and variance analysis results of Linear Mixed Effects**  
291 **Model 1.**

292

293 **Table S3. Supplementary Table 3. Comparison of the declining percentage and the mean**  
294 **decline rate of platelet count from the first trimester to the time of delivery.**

295

296 **Table S4. The parameter estimation and variance analysis results of Linear Mixed Effects**  
297 **Model 2.**

298

299 **Table S5. SNP-based heritability and LD score regression results of platelet count during the**  
300 **first, second, and third trimesters, at delivery, and during the postpartum period.**

301

302 **Table S6. Genetic correlations between platelet count during the first, second, and third**  
303 **trimesters, at delivery, and during the postpartum period.**

304

305 **Table S7. Genome-wide significant signals of meta-analyses and GWASs of platelet counts**  
306 **during the first, second, and third trimesters, at delivery, and during the postpartum period**  
307 **in two cohorts.**

308

309 **Table S8. GWAS meta-analyses results for platelet count and MPV during the first, second,**  
310 **and third trimesters, at delivery, and during the postpartum period, and GT.**

311

312 **Table S9. 8 novel genome-wide significant loci of GWAS meta-analyses of platelet counts**  
313 **during the first, second, and third trimesters, at delivery, and the postpartum period.**

314

315 **Table S10. Successfully colocalized (Posterior probability of colocalization  $\geq 0.8$ ) and the**  
316 **highest probability variant implicated by colocalization.**

317

318 **Table S11. Lead SNPs with time-dependent genetic effects of platelet count and MPV during**  
319 **the first, second, and third trimesters.**

320

321 **Table S12. Meta-analysis results of all SNPs with time-dependent genetic effects during the**  
322 **first, second, and third trimesters.**

323

324 **Table S13. The parameter estimation of the null model of TrajGWAS analysis for**  
325 **Longgang.**

326

327 **Table S14. The parameter estimation of the null model of TrajGWAS analysis for Baoan.**

328

329 **Table S15. Lead SNPs associated with the mean of platelet count for Longgang.**

330

331 **Table S16. Lead SNPs associated with the mean of platelet count for Baoan.**

332

333 **Table S17. All variants associated with within-subject (WS) variability of platelet count**  
334 **during pregnancy for Longgang.**

335

336 **Table S18. All variants associated with within-subject (WS) variability of platelet count**  
337 **during pregnancy for Baoan.**

338

339 **Table S19. Genome-wide significant signals of GWAS meta-analysis for GT.**

340

341 **Table S20. The optimal platelet count polygenic risk scores and their performance in**  
342 **validation sets.**

343

344 **Table S21. The performance of the optimal platelet count polygenic risk scores in testing**  
345 **sets.**

346

347 **Table S22. The performance of the optimal platelet count polygenic risk scores for**  
348 **predicting GT.**

349

350 **Table S23. Maternal and neonatal outcomes of mild GT cases, severe GT cases, and controls**  
351 **during pregnancy.**

352

353 **Table S24. Demographic characteristics and platelet count of mild GT cases, severe GT**  
354 **cases, and controls of pregnancies with platelet count measurements at all five periods.**

355

356 **Table S25. Genome-wide significant signals of meta-analyses and GWASs of MPV during**  
357 **the first, second, and third trimesters, at delivery, and during the postpartum period in two**  
358 **cohorts.**

359

360 **Table S26. Lead SNPs associated with mean of MPV for Longgang**

361

362 **Table S27. Lead SNPs associated with mean of MPV for Baoan**

363

364 **Table S28. All variants associated with within-subject (WS) variability of MPV during**  
365 **pregnancy for Longgang**

366

367 **Table S29. All variants associated with within-subject (WS) variability of MPV during**  
368 **pregnancy for Baoan**

369

370 **Supplementary Figures**

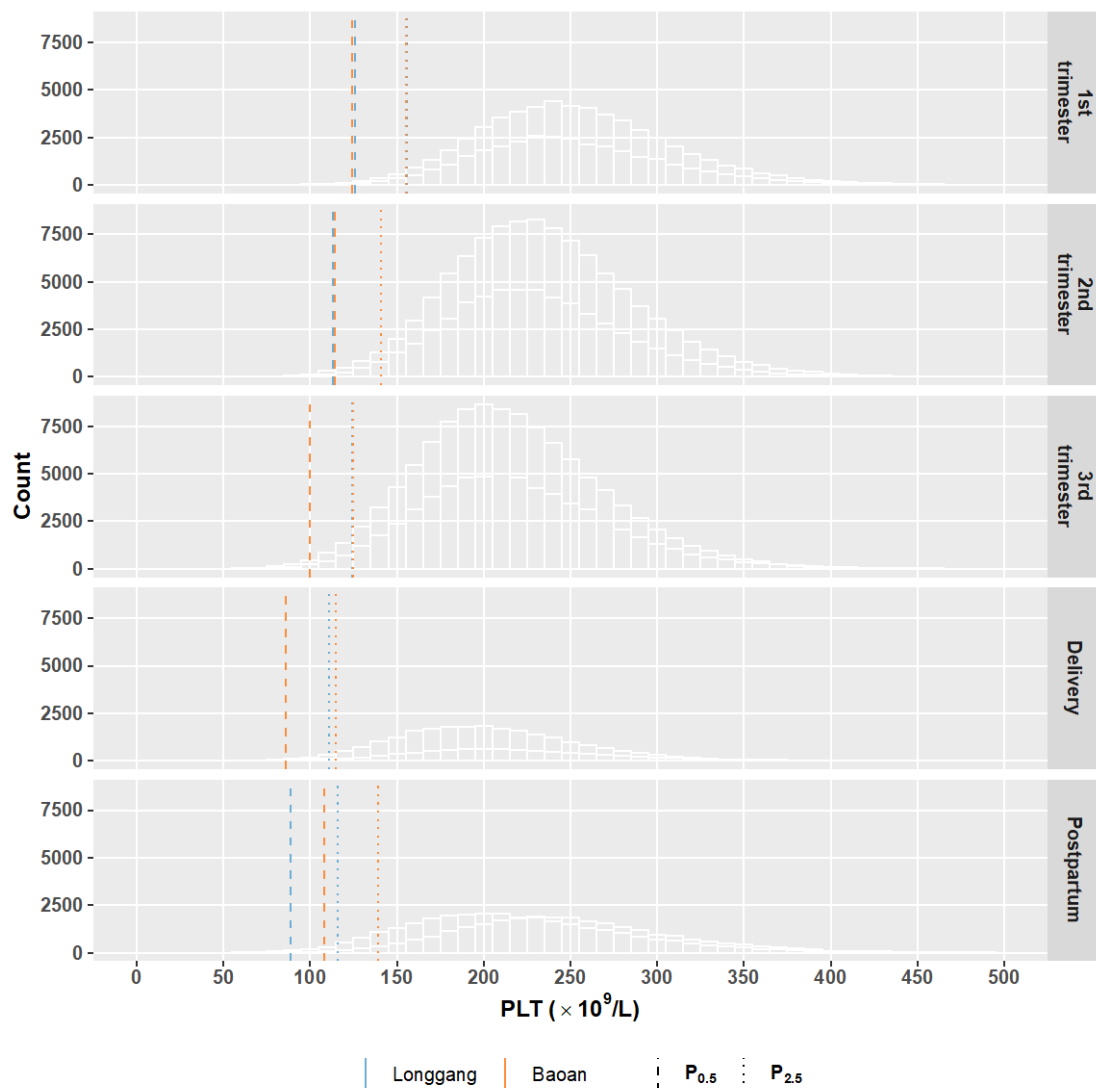

371

372 **Figure S1. The distribution of platelet counts and the 0.5th and 2.5th percentiles during the**

373 **first, second, and third trimesters, at delivery, and during the postpartum period from two**

374 **cohorts.**

375



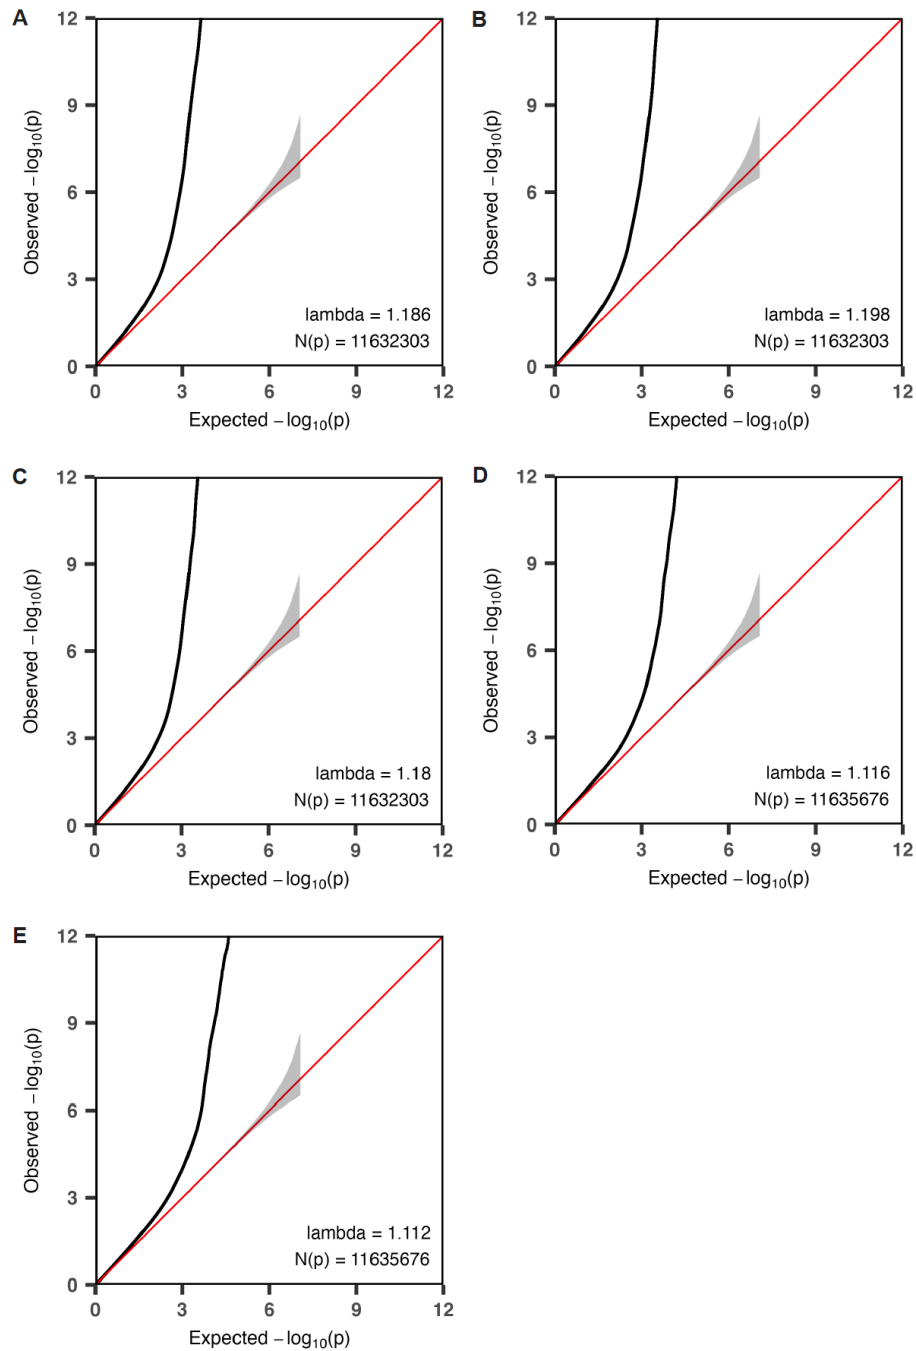

376 **Figure S2. QQ plots of GWAS meta-analyses of platelet count during pregnancy, at delivery,**  
 377 **and during the postpartum period.**

378 QQ plots for GWAS meta-analyses of platelet counts during (A) the first, (B) second, and (C)  
 379 third trimester, (D) at delivery, and (E) during the postpartum period show the observed  $-\log_{10}(P$ -  
 380 value) in our GWAS meta-analyses against expected  $-\log_{10}(P$ -value). The red line indicates the  
 381 distribution of  $P$  values under the null hypothesis and the gray shaded area indicates standard  
 382 errors.

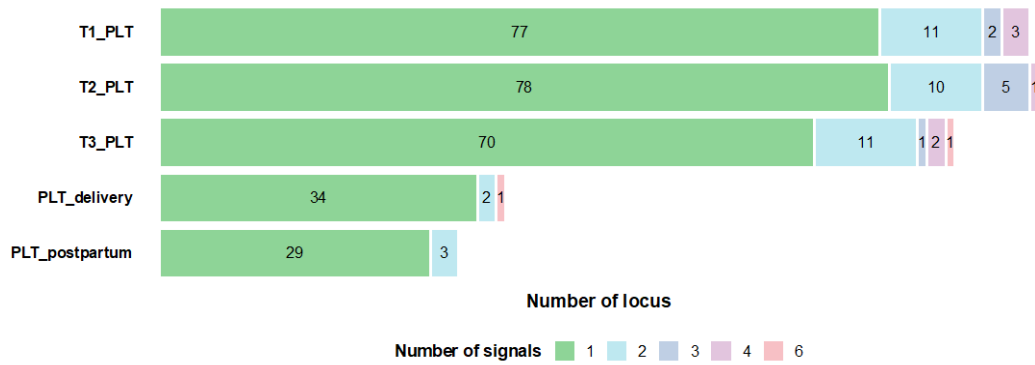

383 **Figure S3. The number of genome-wide significant loci and signals for the GWAS meta-**  
 384 **analyses of platelet count during pregnancy, at delivery, and during the postpartum period.**  
 385 The number of loci with different numbers of signals for each period is shown in the plot.  
 386 T1\_PLT: Platelet counts during the first trimester; T2\_PLT: Platelet counts during the second  
 387 trimester; T3\_PLT: Platelet counts during the third trimester; PLT\_delivery: Platelet counts at  
 388 delivery; PLT\_postpartum: Platelet counts during the postpartum period.  
 389

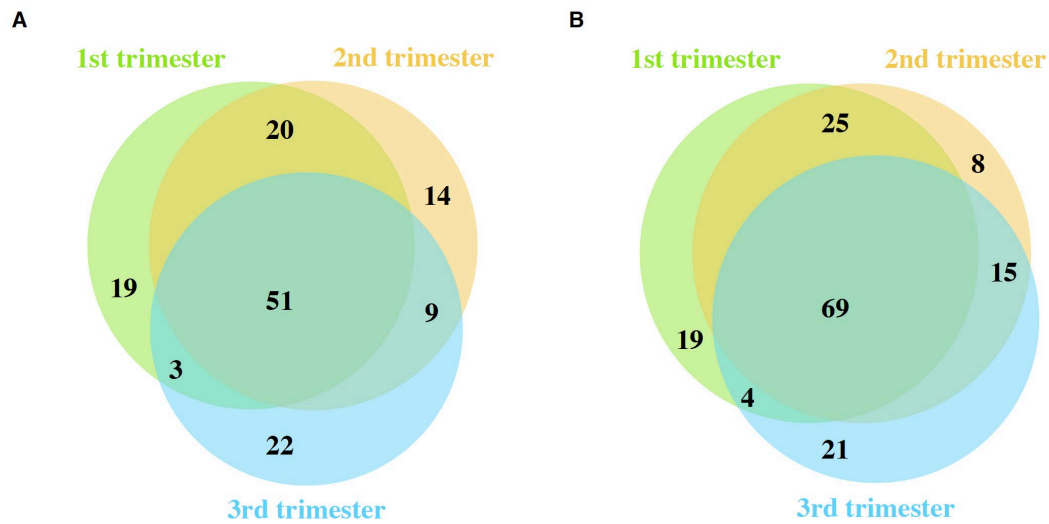

390 **Figure S4. The number of genome-wide significant loci and signals for platelet count during**  
 391 **the first, second, and third trimesters.**

392 Venn diagrams showing the number of genome-wide significant (A) loci and (B) signals for  
 393 platelet count during the first, second, and third trimesters. The number of unique loci/signals for  
 394 each trimester and shared loci/signals between or among different trimesters are shown in the  
 395 corresponding regions.

396  
 397

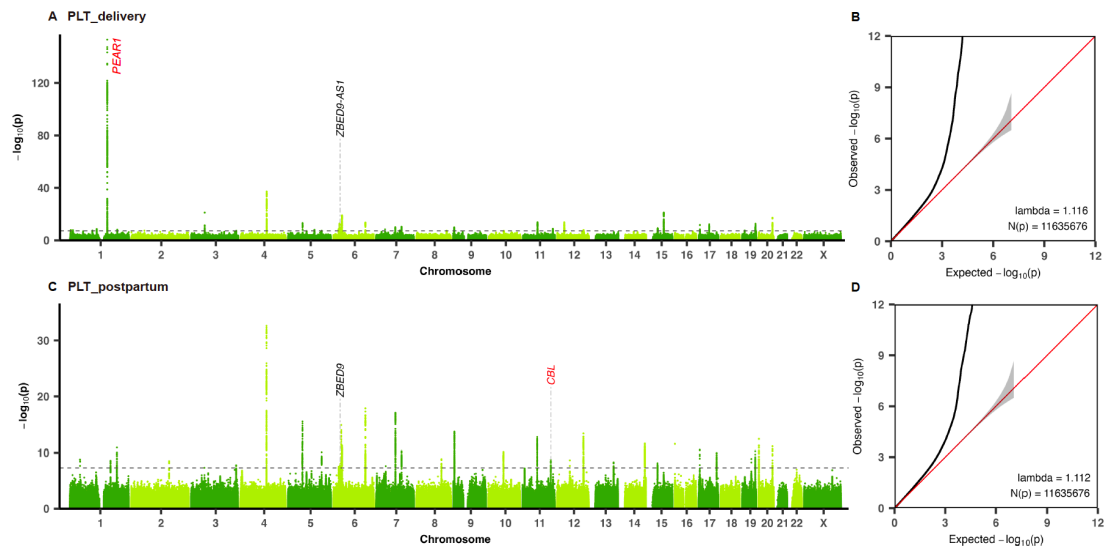

398 **Figure S5. Manhattan plots and QQ plots for GWAS of platelet count at delivery and during**  
 399 **the postpartum period.**

400 GWASs of platelet count at delivery and during the postpartum period were undertaken with  
 401 33,553 and 34,457 Chinese pregnant women, respectively. Manhattan plots for GWAS meta-  
 402 analyses of platelet counts (A) at delivery and (C) during the postpartum period. GWAS for each  
 403 hospital was carried out with a linear regression model, and the first to tenth principal  
 404 components, maternal age, and gestation age correspond to the time of the platelet count test as  
 405 covariates. The x-axis shows the ordered chromosomes and the y-axis indicates  $-\log_{10}(P\text{-value})$  for  
 406 the association tests. The dashed black line represents the genome-wide significance threshold for  
 407 GWAS ( $P = 5 \times 10^{-8}$ ). A total of 37 and 32 genome-wide significant independent loci (44 and 35  
 408 signals) achieved the genome-wide significance threshold. Labels in black indicate the novel loci,  
 409 and labels in red highlight the two loci (*PEAR1* and *CBL*) with time-dependent genetic effects  
 410 during pregnancy. QQ plots for GWAS meta-analyses of platelet counts (B) at delivery and (D)  
 411 during the postpartum period show the observed  $-\log_{10}(P\text{-value})$  in our GWAS meta-analyses  
 412 against expected  $-\log_{10}(P\text{-value})$ . The red dashed line indicates the distribution of  $P$  values under  
 413 the null hypothesis and the gray shaded area indicates standard errors.  
 414

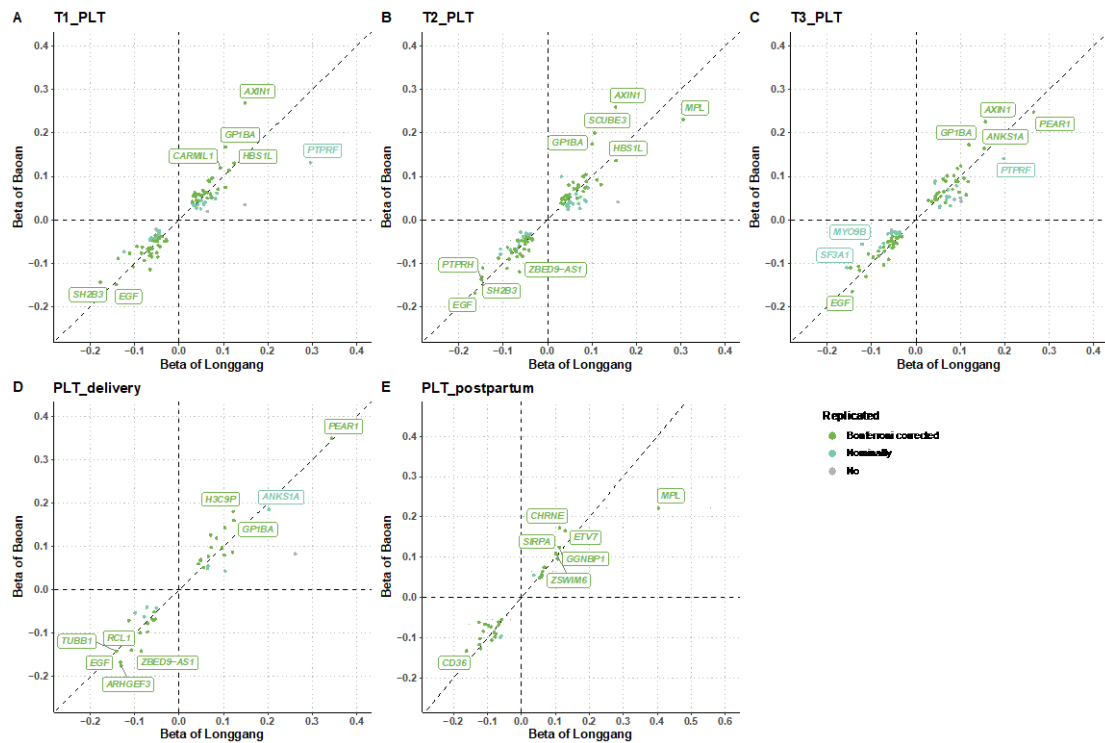

415 **Figure S6. Comparing GWAS of platelet count during pregnancy, at delivery, and during**  
 416 **the postpartum period of Longgang to Baoan.**  
 417 Comparing the direction of beta and *P* values of the lead SNPs of GWAS of platelet count during  
 418 (A) the first trimester, (B) the second trimester, (C) the third trimester, (D) at delivery, and (E)  
 419 during the postpartum period between the two hospitals. The x-axis indicates the beta of GWAS of  
 420 each trait for Longgang, and the y-axis indicates the beta of GWAS for Baoan. The error bars  
 421 indicate the 95% CI of beta. Colored points represent lead SNPs with the same direction of beta  
 422 and Bonferroni corrected significant *P* values (green), with the same direction of beta and  
 423 nominally significant *P* values (cyan), and with different directions of beta and/or *P* values > 0.05  
 424 (grey). The Bonferroni significant threshold was calculated as 0.05 divided by the number of  
 425 independent loci for each trait.  
 426

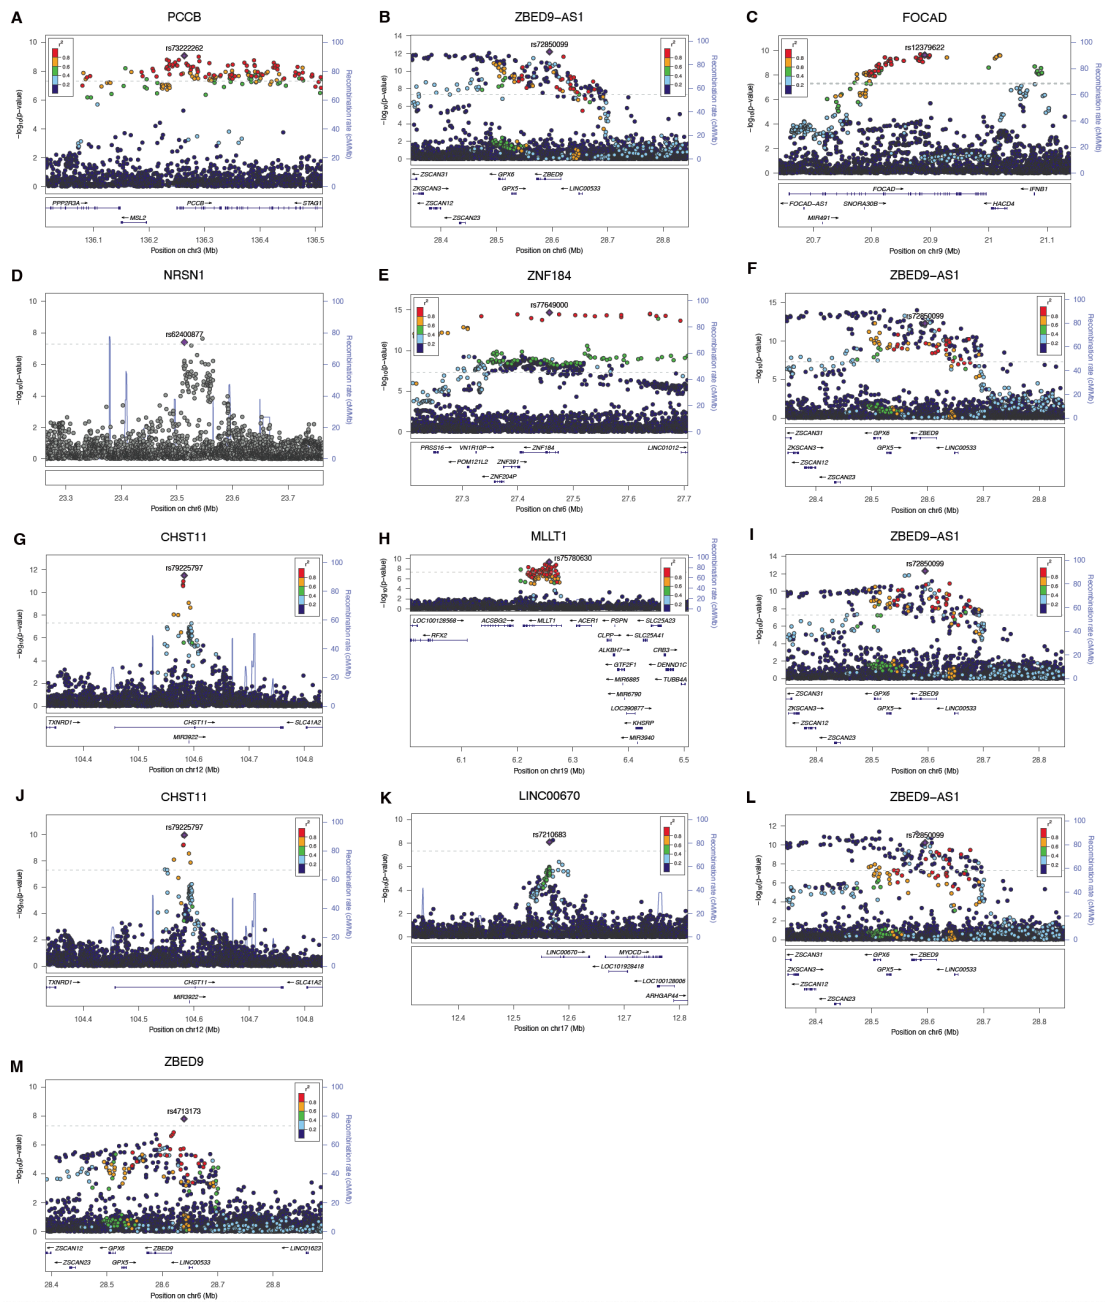

427 **Figure S7. Regional association plots for novel loci of GWAS meta-analyses of platelet count**  
 428 **during pregnancy, at delivery, and during the postpartum period.**  
 429 Regional association plots for novel loci of GWAS meta-analyses of platelet count during the first  
 430 trimester at (A) 3q22.3 (*PCCB*), (B) 6p22.1 (*ZBED9-AS1*), and (C) 9p21.3 (*FOCAD*), during the  
 431 second trimester at (D) 6p22.3 (*NRSN1*), (E) 6q22.1 (*ZNF184*), (F) 6p22.1 (*ZBED9-AS1*), (G)  
 432 12q23.3 (*CHST11*), and (H) 19p13.3 (*MLLT1*), during the third trimester at (I) 6p22.1 (*ZBED9-*  
 433 *ASI*), (J) 12q23.3 (*CHST11*), and (K) 17p12 (*LINC00670*), at delivery at (L) 6p22.1 (*ZBED9-*  
 434 *ASI*), and during the postpartum period at (M) 6p22.1 (*ZBED9*). The *x* axis shows the

435 chromosomal positions (GRCh38) and the  $y$  axis indicates  $-\log_{10}(P\text{-value})$  for the association tests.  
436 The purple diamond indicates the lead SNP of each locus. The other SNPs are colored based on  
437 their LD  $r^2$  with the lead SNP. The dashed grey line represents the genome-wide significance  
438 threshold for GWAS ( $P = 5 \times 10^{-8}$ ).  
439

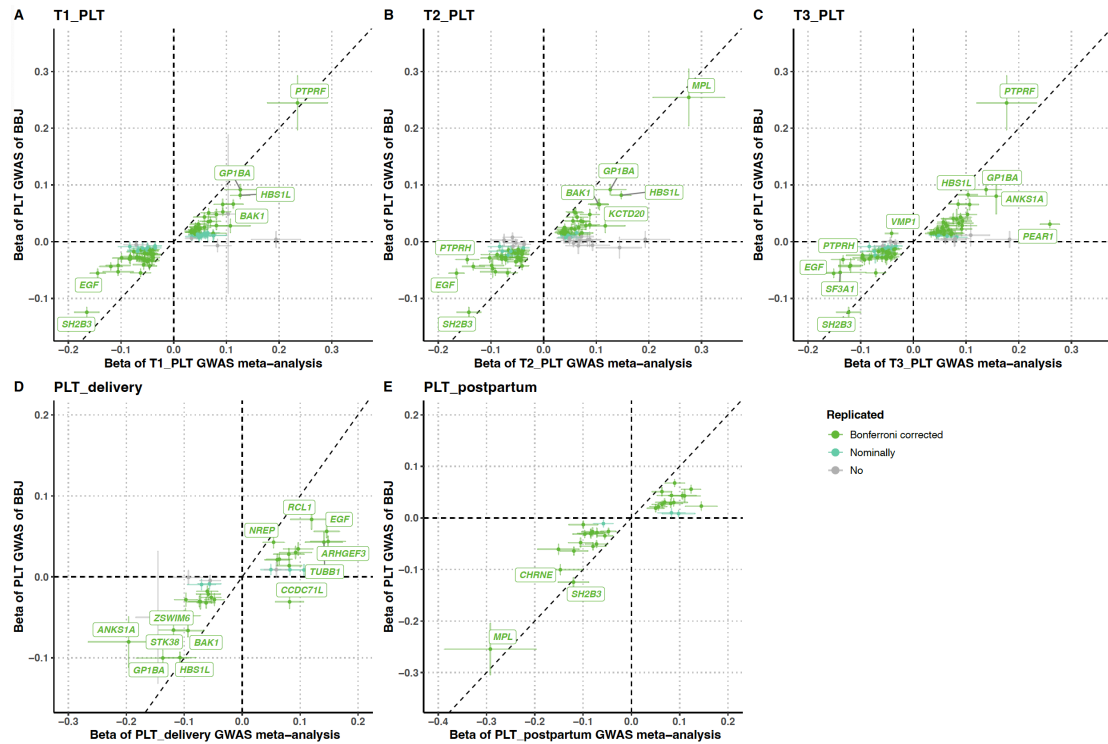

440 **Figure S8. Comparing GWAS meta-analyses of platelet count during pregnancy, at delivery,**  
 441 **and during the postpartum period to the GWAS summary statistics of platelet count in BBJ.**  
 442 Comparing the independent genome-wide significant loci of our GWAS meta-analyses during (A)  
 443 the first trimester, (B) the second trimester, (C) the third trimester, (D) at delivery, and (E) during  
 444 the postpartum period to a GWAS of platelet count from the BioBank Japan Project (BBJ). The x-  
 445 axis indicates the beta of GWAS of each trait in our GWAS meta-analyses, and the y-axis  
 446 indicates the beta of GWAS of platelet count in BBJ. The error bars indicate the 95% CI of beta.  
 447 Colored points represent lead SNPs with the same direction of beta and Bonferroni corrected  
 448 significant  $P$  values (green), with the same direction of beta and nominally significant  $P$  values  
 449 (cyan), and with different directions of beta and/or  $P$  values  $> 0.05$  (grey). The Bonferroni  
 450 significant threshold was calculated as 0.05 divided by the number of independent loci for each  
 451 trait.  
 452



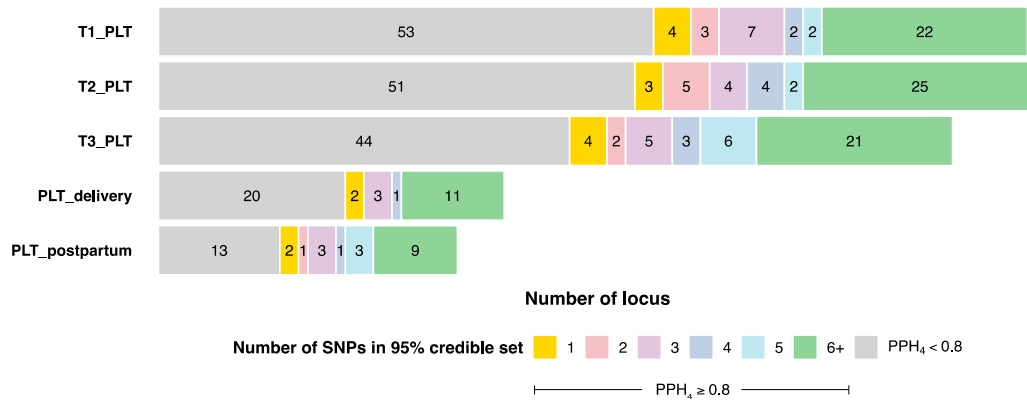

453 **Figure S9. The result of co-localization between the GWAS of platelet count of the five**  
 454 **periods of pregnancy and the platelet count in BBJ.**

455 The grey bars represent the number of loci unsuccessfully co-localized ( $PPH_4 < 0.8$ ). The bars in  
 456 the other six colors represent the number of loci successfully co-localized ( $PPH_4 \geq 0.8$ ), these  
 457 colors represent the different numbers of SNPs (from 1 to 6+) in the 95% credible set of each  
 458 locus. BBJ: the BioBank Japan Project; T1\_PLT: Platelet counts during the first trimester;  
 459 T2\_PLT: Platelet counts during the second trimester; T3\_PLT: Platelet counts during the third  
 460 trimester; PLT\_delivery: Platelet counts at delivery; PLT\_postpartum: Platelet counts during the  
 461 postpartum period.  
 462

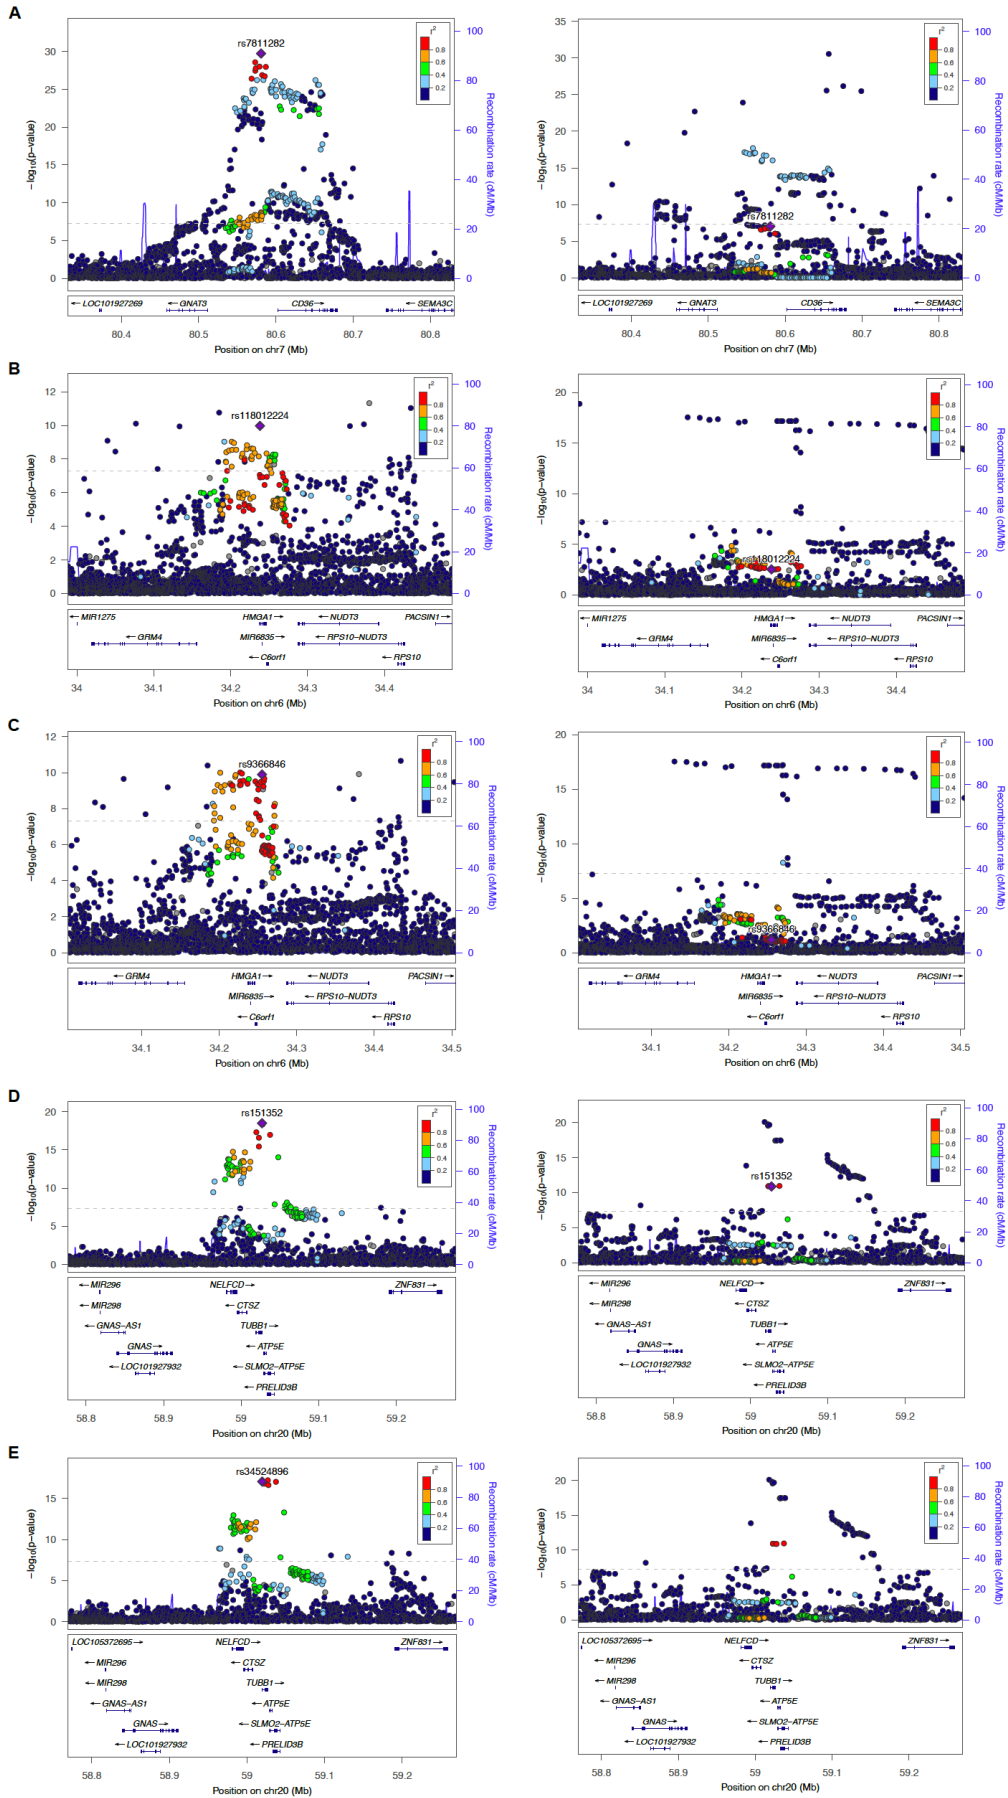

463

464

465 **Figure S10. Regional association plots for five loci with the smallest PPH4 values in the co-**  
466 **localization analysis.**

467 The plots on the left are regional association plots of our GWAS meta-analyses of platelet count,  
468 and the plots on the right are GWAS of platelet count in BBJ. (A) Regional association plots for  
469 our GWAS meta-analyses of platelet count during the first trimester and GWAS of platelet count  
470 in BBJ at 7q21.11 (*CD36*). (B) Regional association plots for our GWAS meta-analyses of platelet  
471 count during the first trimester and GWAS of platelet count in BBJ at 6p21.31 (*HMGAI*). (C)  
472 Regional association plots for our GWAS meta-analyses of platelet count during the second  
473 trimester and GWAS of platelet count in BBJ at 6p21.31 (*SMIM29*). (D) Regional association  
474 plots for our GWAS meta-analyses of platelet count during the first trimester and GWAS of  
475 platelet count in BBJ at 20q13.32 (*ATP5F1E*). (E) Regional association plots for our GWAS meta-  
476 analyses of platelet count during the first trimester and GWAS of platelet count in BBJ at  
477 20q13.32 (*TUBB1*). The *x* axis shows the chromosomal positions (GRCh38) and the *y* axis  
478 indicates  $-\log_{10}(P\text{-value})$  for the association tests. The purple diamond indicates the lead SNP of  
479 each locus. The other SNPs are colored based on their LD  $r^2$  with the lead SNP. The dashed grey  
480 line represents the genome-wide significance threshold for GWAS ( $P = 5 \times 10^{-8}$ ).  
481

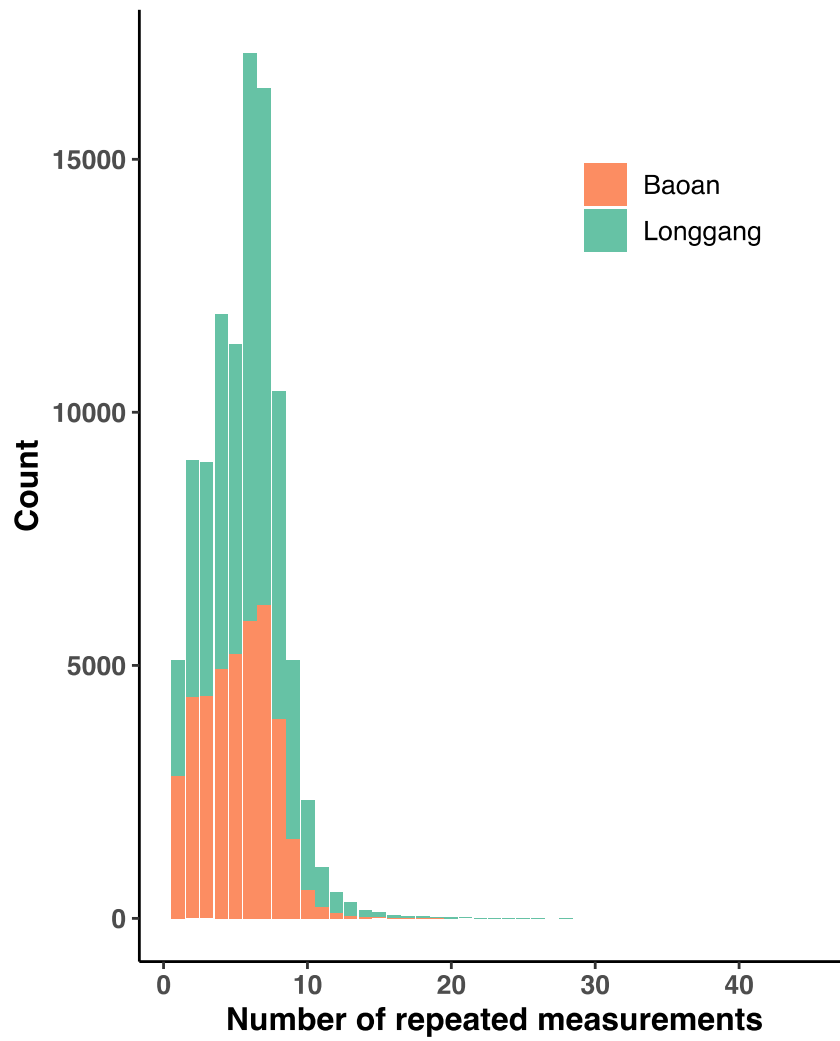

482 **Figure S11. Distribution of the number of repeated measurements of platelet counts in**  
 483 **Baoan and Longgang.**  
 484

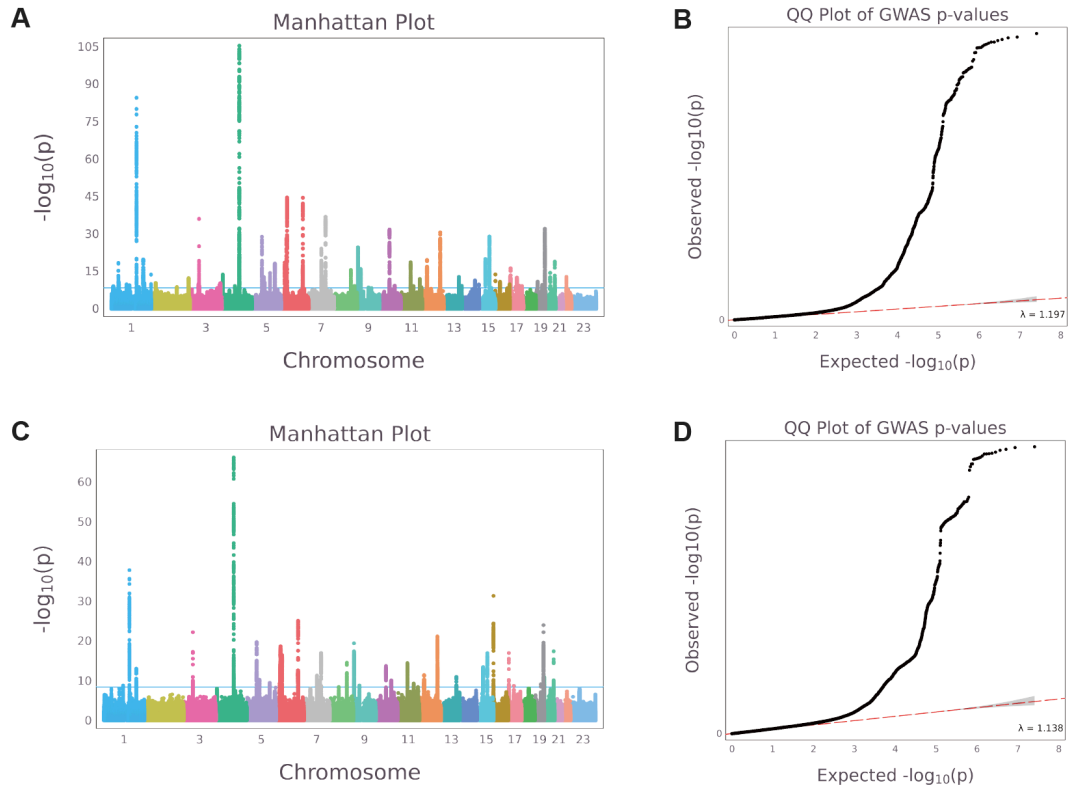

485 **Figure S12. TrajGWAS results of the mean of longitudinal platelet count during pregnancy**  
 486 **and the postpartum period.**

487 100,186 pregnancies (Longgang:  $n = 59,907$ , Baoan:  $n = 40,279$ ) with more than one platelet  
 488 count during pregnancy and the postpartum period were included in the TrajGWAS analyses.  
 489 Platelet counts were rank-based transformed. The first to tenth principal components, age, and  
 490 gestation age corresponding to the time of the platelet count test were adjusted as covariates.  
 491 Manhattan plots for (A) Longgang and (C) Baoan. The x-axis shows the ordered chromosomes  
 492 and the y-axis indicates  $-\log_{10}(P\text{-value})$  for the TrajGWAS analyses. The blue horizontal line  
 493 represents the genome-wide significance threshold ( $P = 5 \times 10^{-8}$ ). QQ plots for (B) Longgang and  
 494 (D) Baoan show the observed  $-\log_{10}(P\text{-value})$  in TrajGWAS analyses against expected  $-\log_{10}(P\text{-}$   
 495 value). The red dashed line indicates the distribution of  $P$  values under the null hypothesis and the  
 496 gray shaded area indicates standard errors.  
 497

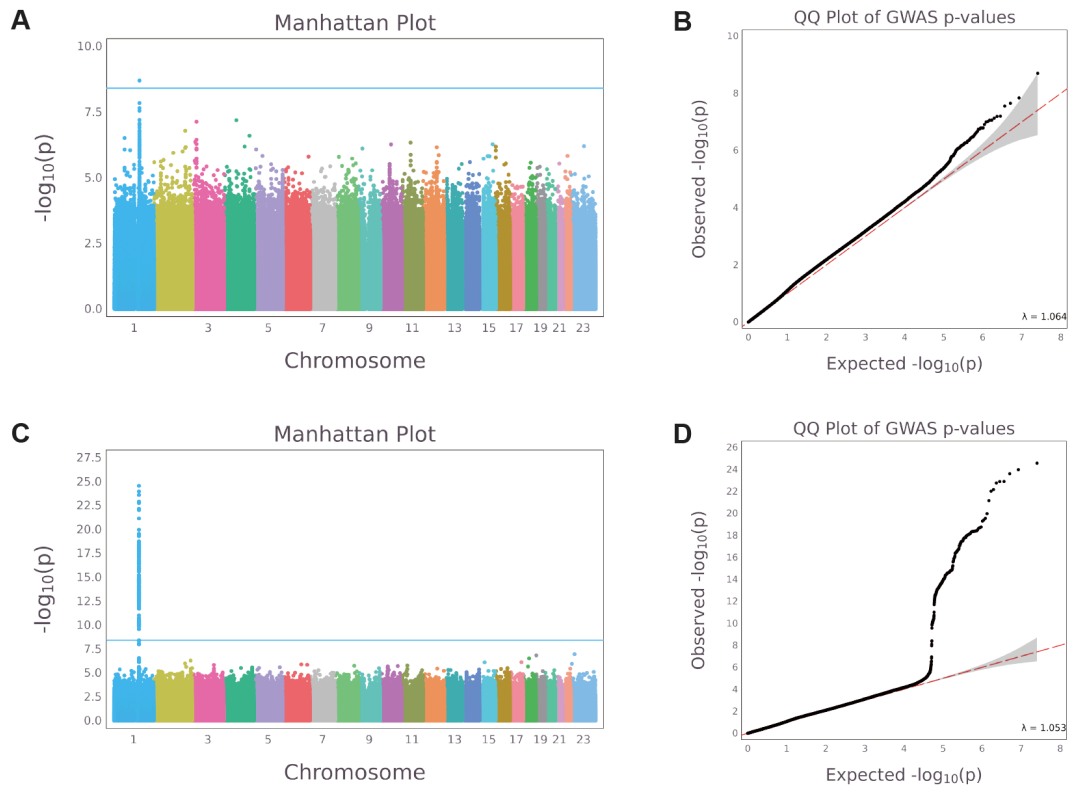

498 **Figure S13. TrajGWAS results of the within-subject variability of longitudinal platelet**  
 499 **counts during pregnancy and the postpartum period.**  
 500 100,186 pregnancies (Longgang:  $n = 59,907$ , Baoan:  $n = 40,279$ ) with more than one platelet  
 501 count during pregnancy and the postpartum period were included in the TrajGWAS analyses.  
 502 Platelet counts were rank-based transformed. The first to tenth principal components, age, and  
 503 gestation age corresponding to the time of the platelet count test were adjusted as covariates.  
 504 Manhattan plots for (A) Longgang and (C) Baoan. The x-axis shows the ordered chromosomes  
 505 and the y-axis indicates  $-\log_{10}(P\text{-value})$  for the TrajGWAS analyses. The blue horizontal line  
 506 represents the genome-wide significance threshold ( $P = 5 \times 10^{-8}$ ). QQ plots for (B) Longgang and  
 507 (D) Baoan show the observed  $-\log_{10}(P\text{-value})$  in TrajGWAS analyses against expected  $-\log_{10}(P\text{-}$   
 508 value). The red dashed line indicates the distribution of  $P$  values under the null hypothesis and the  
 509 gray shaded area indicates standard errors.  
 510

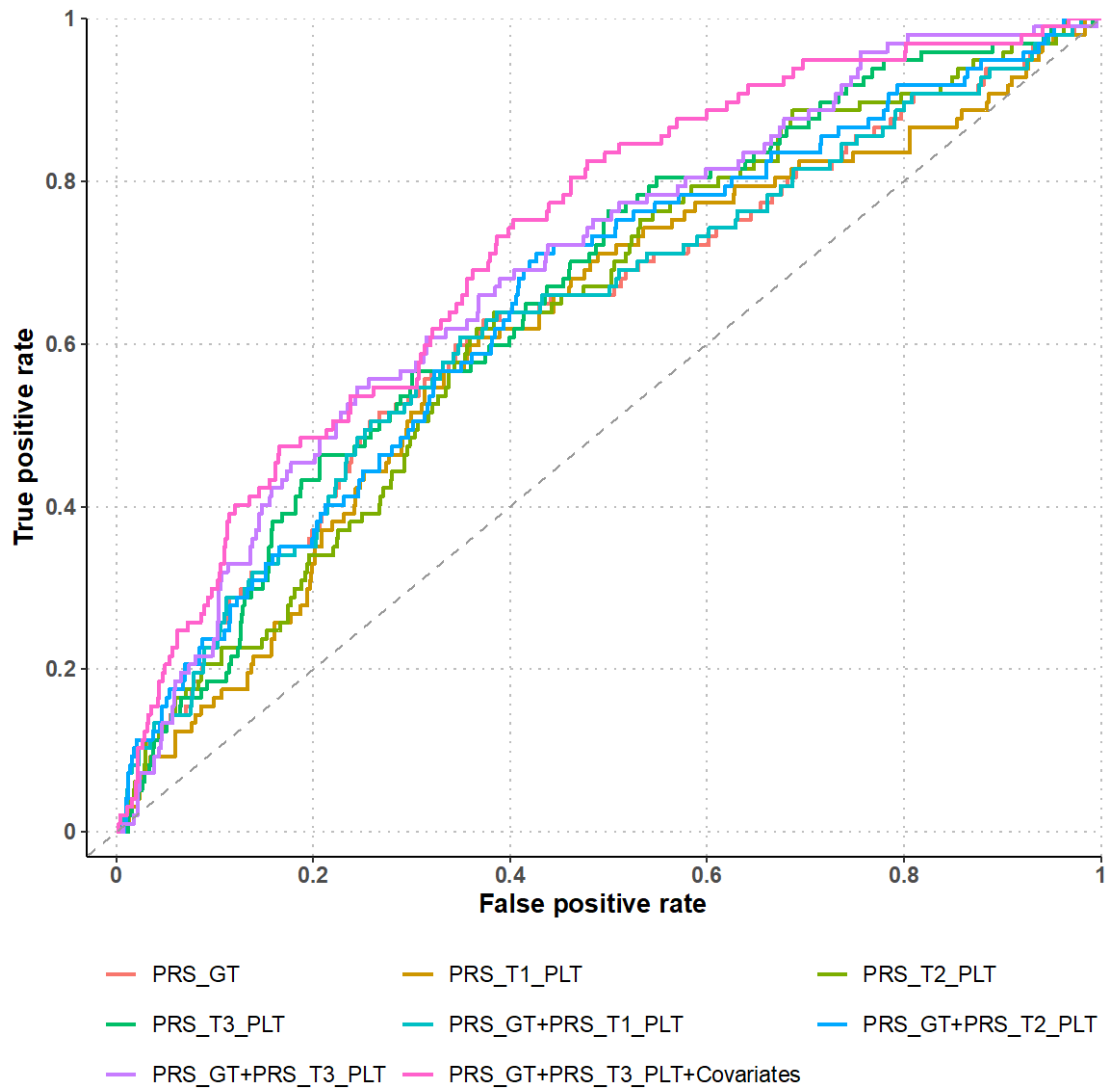

511 **Figure S14. Receiver operating characteristic (ROC) curves of 8 models for GT.**

512 Covariates include the top 10th principal component and maternal age. T1\_PLT: Platelet counts

513 during the first trimester; T2\_PLT: Platelet counts during the second trimester; T3\_PLT: Platelet

514 counts during the third trimester; GT: Gestational Thrombocytopenia.

515

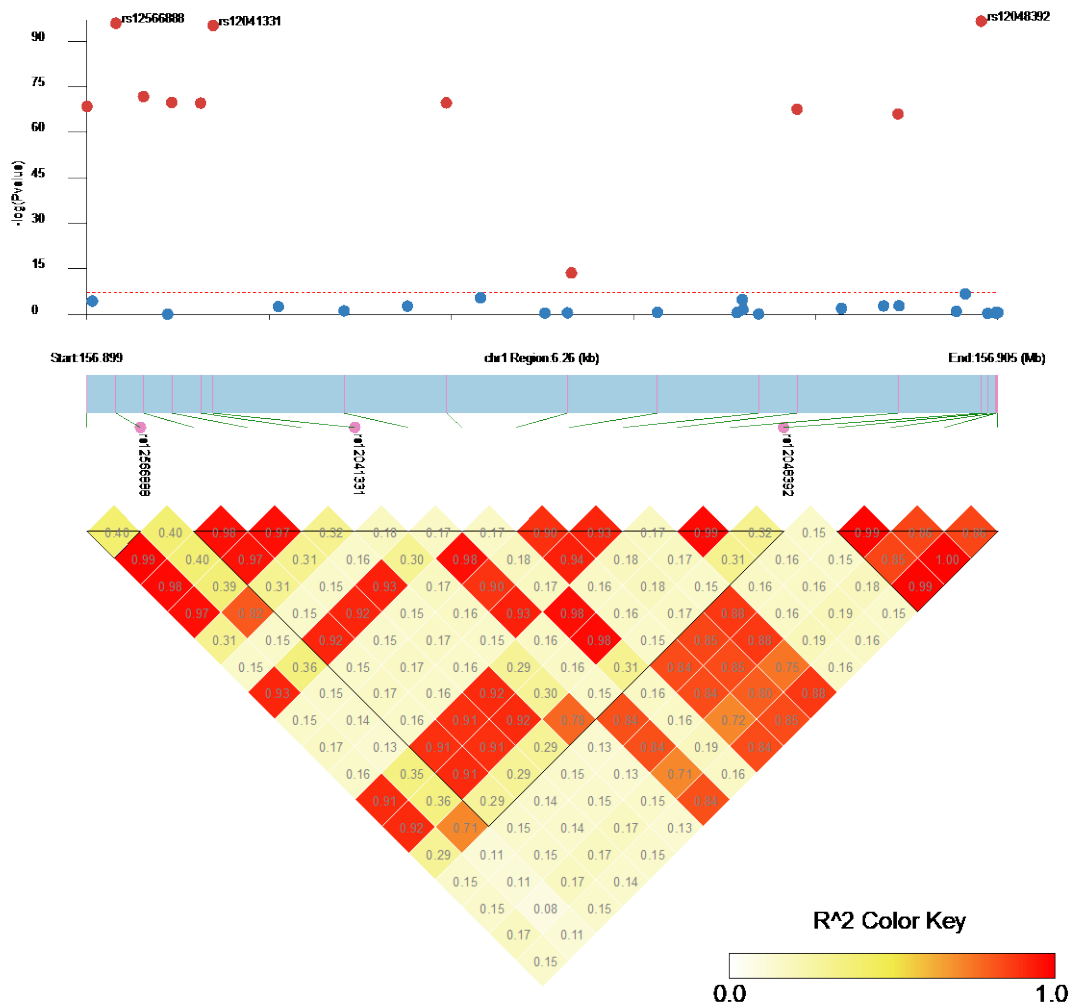

516

517 **Figure S15. Regional association plots and LD heatmap of GT in *PEAR1* locus.**

518 The LD  $R^2$  was calculated using our reference panel from BIGCS (<http://gdbig.bigcs.com.cn/>).

519



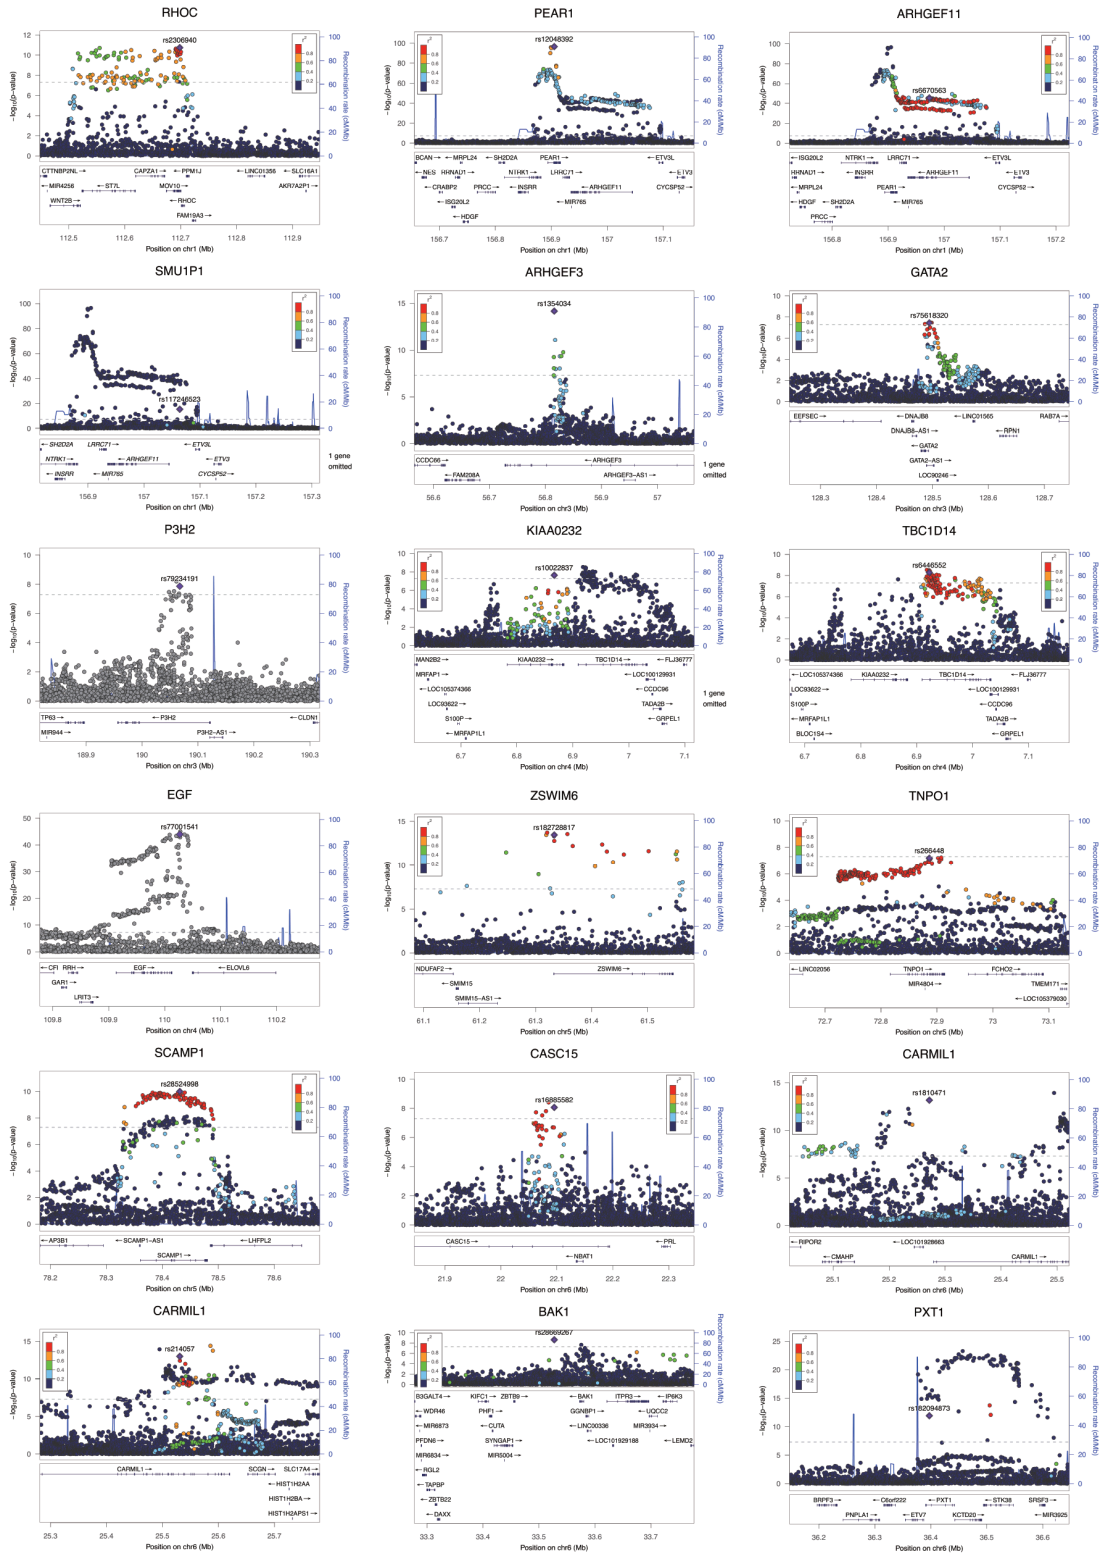

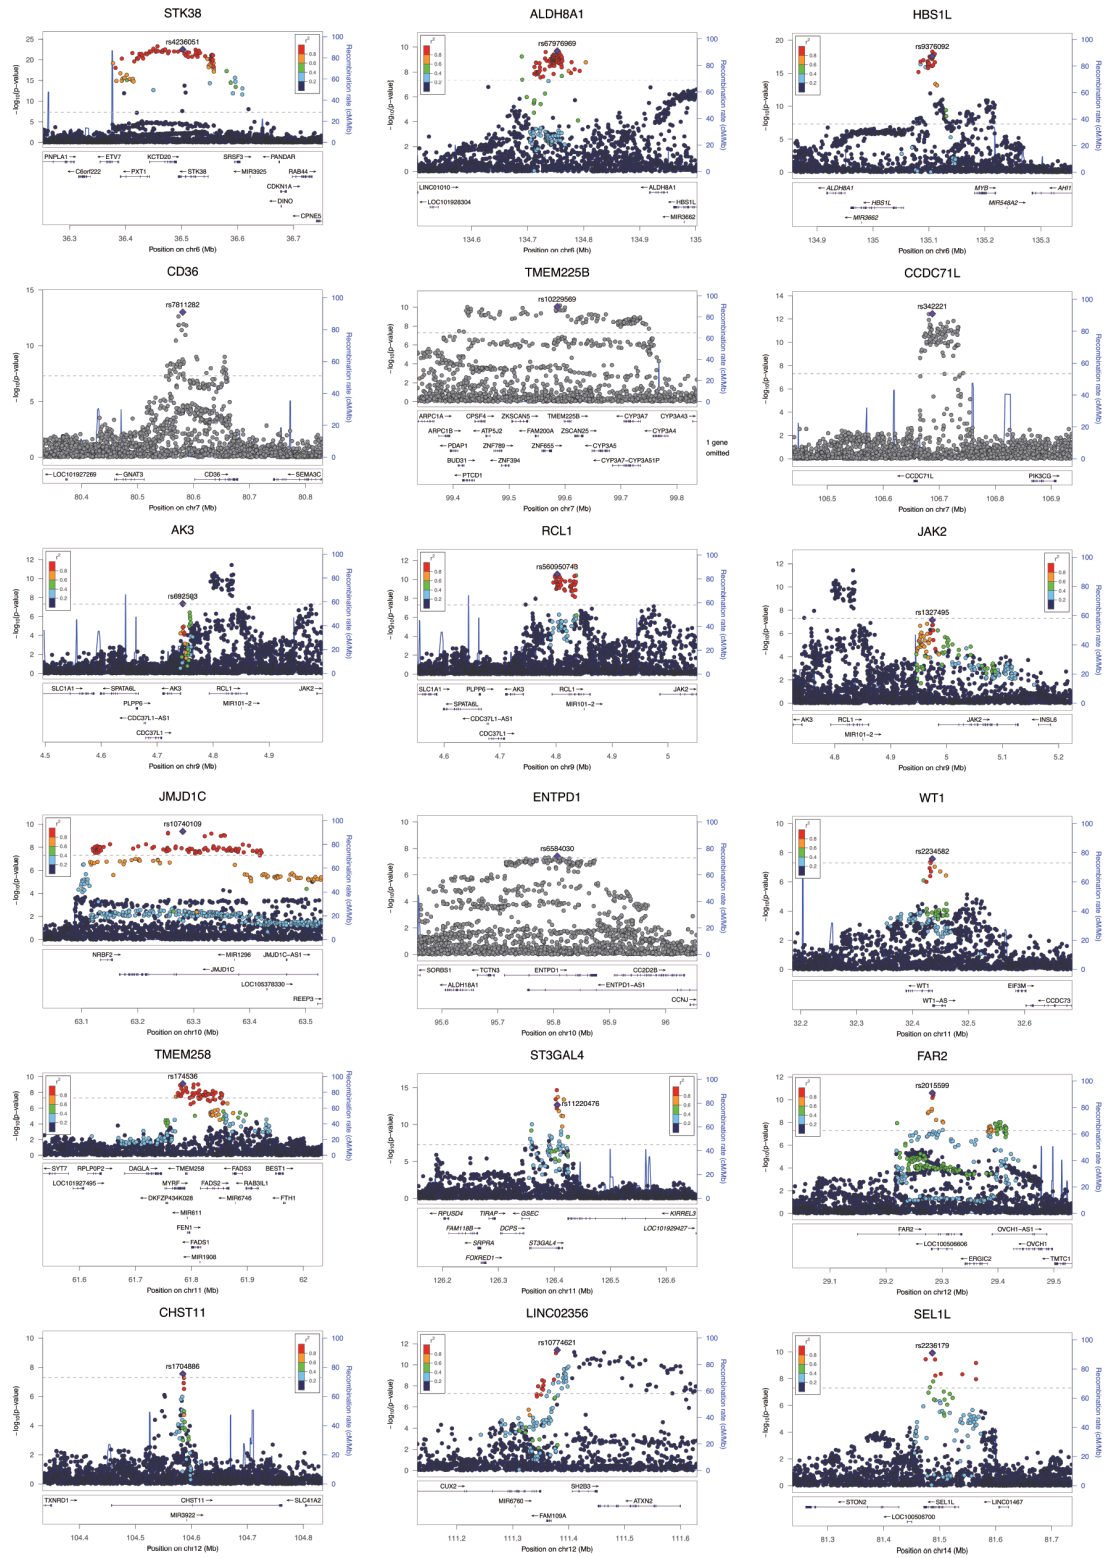

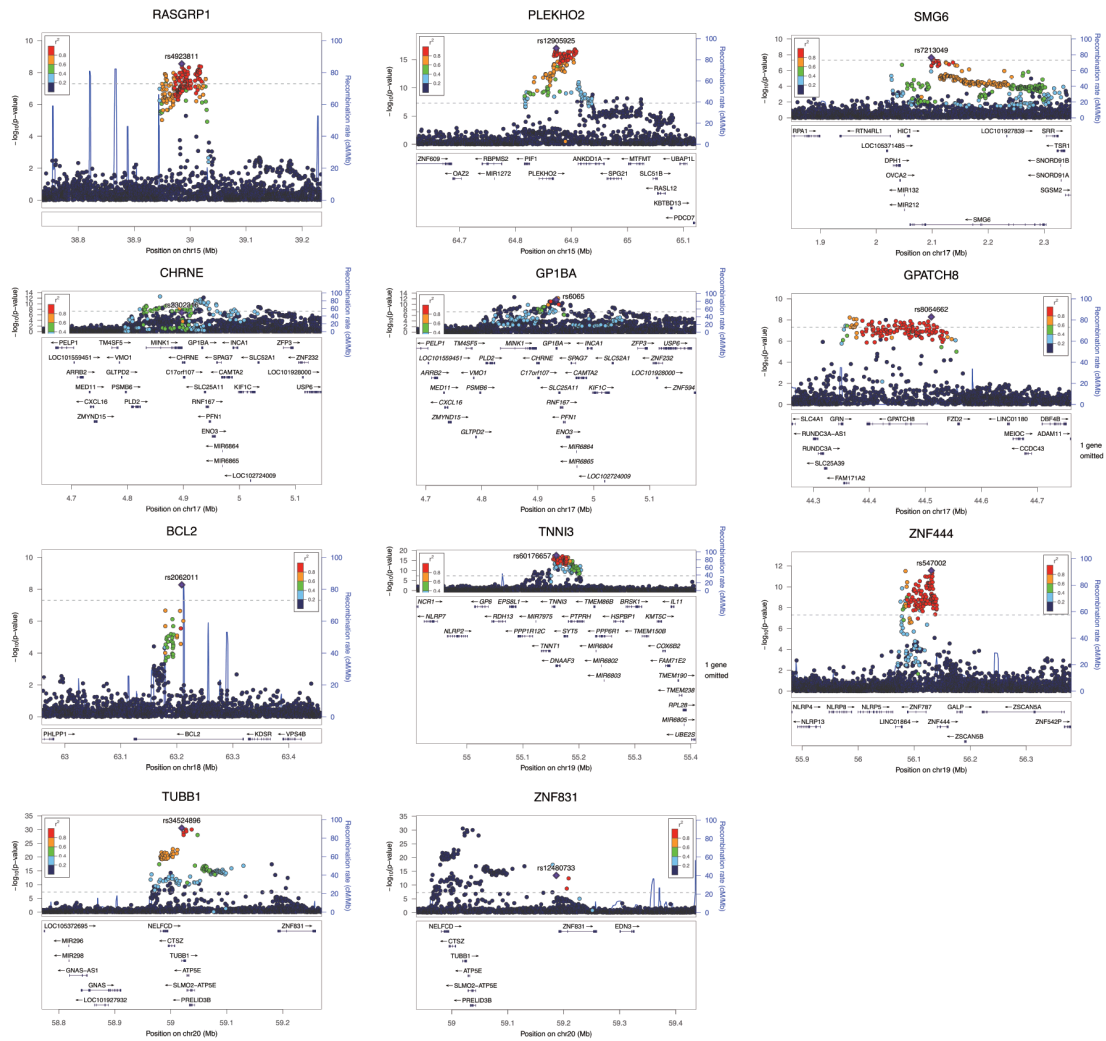

520 **Figure S16. Regional association plots for novel loci of GWAS meta-analyses of GT.**

521 Regional association plots for 37 novel loci of GWAS meta-analyses of GT. The x-axis shows the  
 522 chromosomal positions (GRCh38) and the y-axis indicates  $-\log_{10}(P\text{-value})$  for the association  
 523 tests. The purple diamond indicates the lead SNP of each locus. The other SNPs are colored based  
 524 on their LD  $r^2$  with the lead SNP. The dashed grey line represents the genome-wide significance  
 525 threshold for GWAS ( $P = 5 \times 10^{-8}$ ).

526

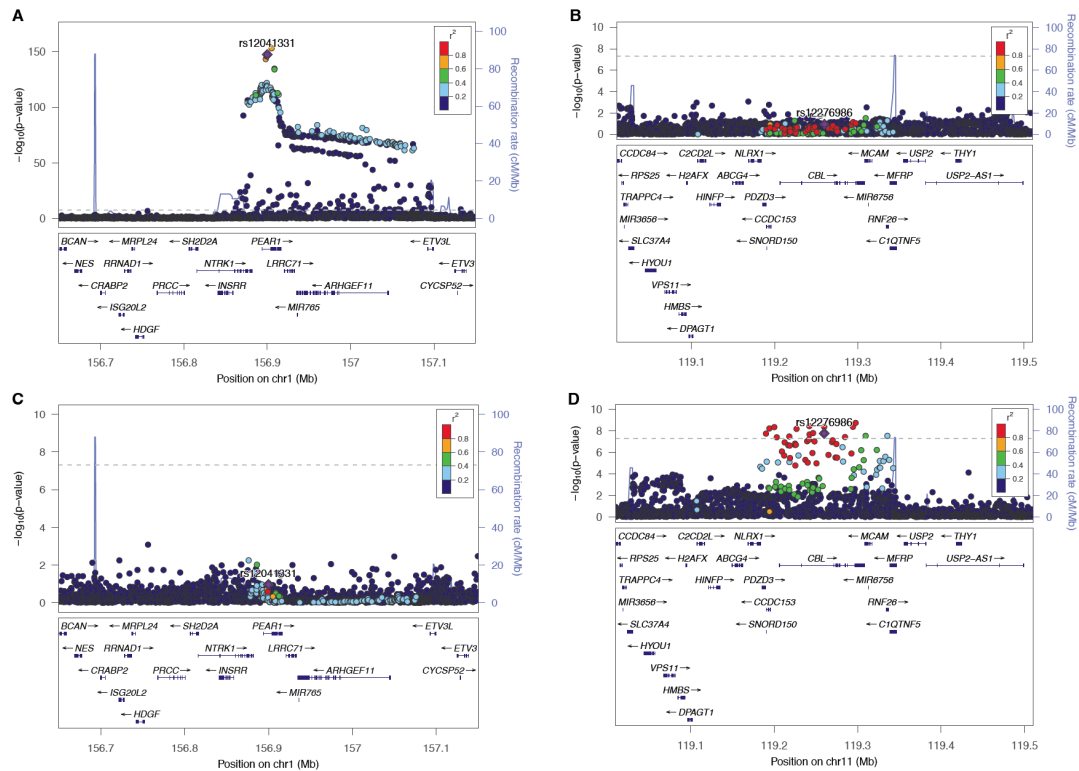

527 **Figure S17. Regional association plots of rs12041331 and rs12276986 for platelet count at**  
 528 **delivery and during the postpartum period.**

529 Regional association plots of rs12041331 in *PEAR1* for platelet count (A) at delivery and (C) during  
 530 the postpartum period, and regional association plots of rs12276986 in *CBL* for platelet count (B)  
 531 at delivery and (D) during the postpartum period. The x-axis shows the chromosomal positions  
 532 (GRCh38) and the y-axis indicates  $-\log_{10}(P\text{-value})$  for the association tests. The purple diamond  
 533 indicates the lead SNP of each locus. The other SNPs are colored based on their LD  $r^2$  with the lead  
 534 SNP. The dashed grey line represents the genome-wide significance threshold for GWAS ( $P = 5 \times 10^{-8}$ ).  
 535  
 536

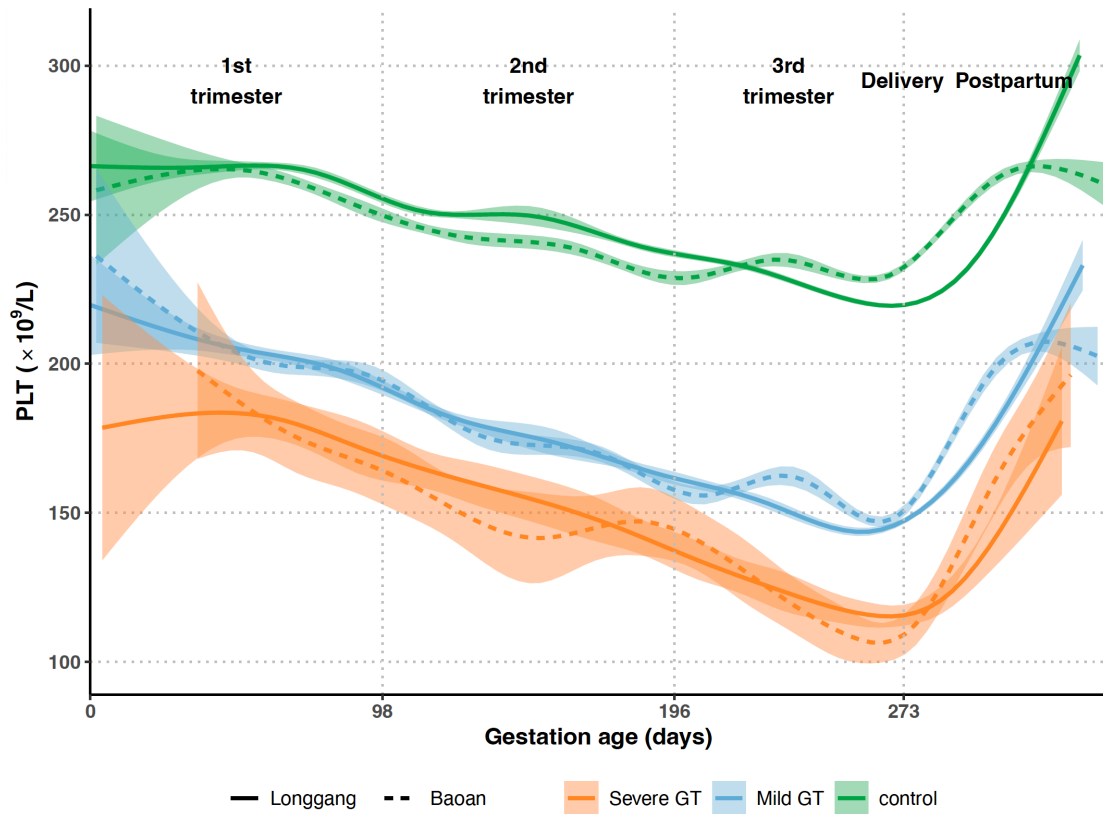

537

538 **Figure S18. Mean platelet counts over gestation age.**

539 Changes in mean platelet count during the first, second, and third trimesters, at delivery, and  
 540 during the postpartum period in pregnancies diagnosed with severe GT (N = 266), mild GT (N =  
 541 1,992), and controls (N = 12,454) and with platelet count measurements at all five periods. The  
 542 smoothing function is the generalized additive model. The ribbon around the smooth curve  
 543 denotes the 95% confidence interval. PLT: Platelet count; GT: Gestational Thrombocytopenia;  
 544 Baoan: Shenzhen Baoan Maternal and Child Health Hospital; Longgang: Longgang District  
 545 Maternity and Child Healthcare Hospital of Shenzhen City.  
 546

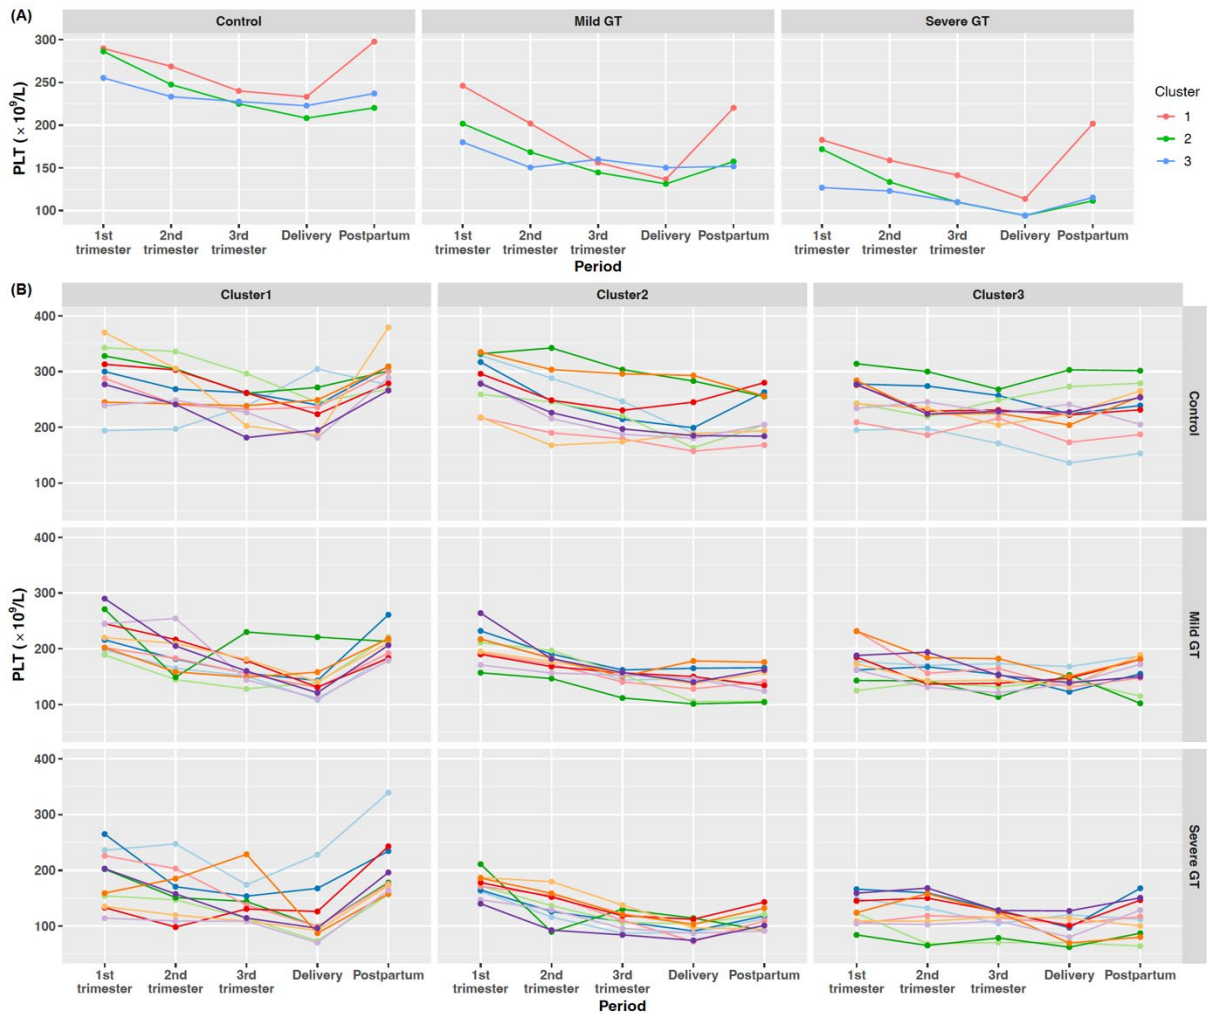

547 **Figure S19. Individual changes in platelet count among mild GT cases, severe GT cases, and**  
 548 **controls during pregnancy.**

549 All pregnant women with platelet count measurements at all five periods. (A) The changes of  
 550 mean platelet count across 5 periods in each cluster. (B) Individual changes of platelet count  
 551 across 5 periods (randomly sampled 10 individuals from each cluster).

552

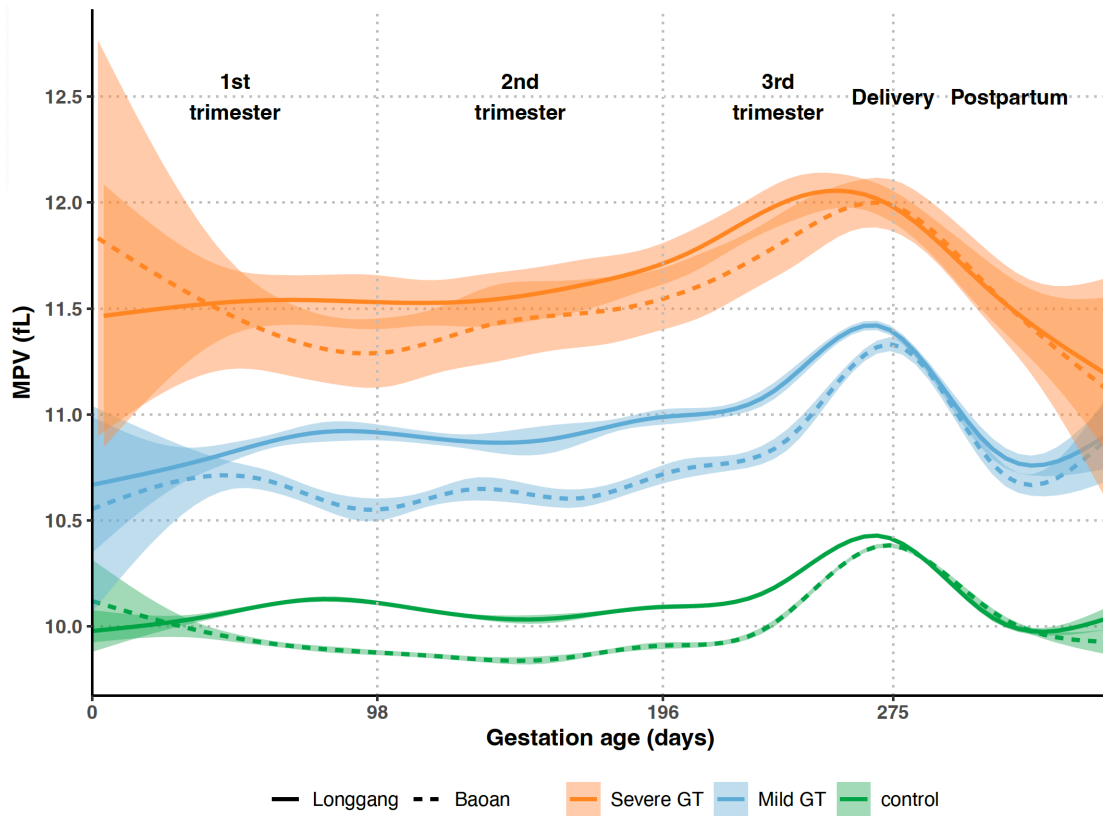

553

554 **Figure S20. Mean platelet volumes over gestation age.**

555 Changes in mean platelet volume (MPV) during the first, second, and third trimesters, at delivery,  
 556 and during the postpartum period in pregnancies diagnosed with severe GT (N = 859), mild GT (N  
 557 = 10,044), and controls (N = 83,015).

558

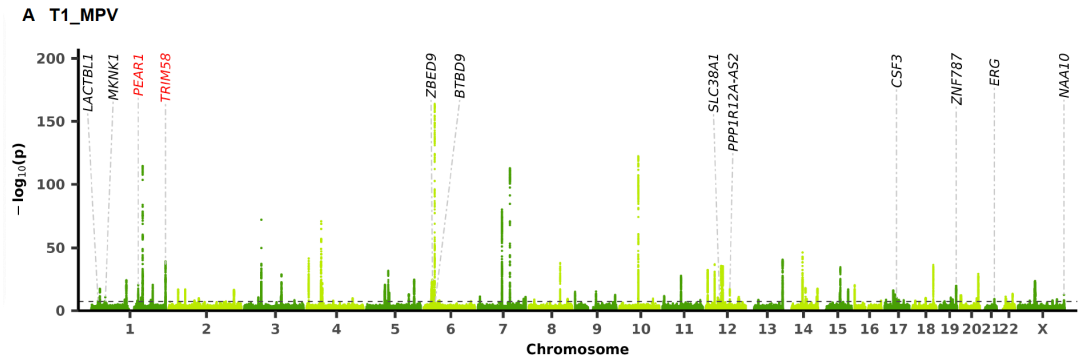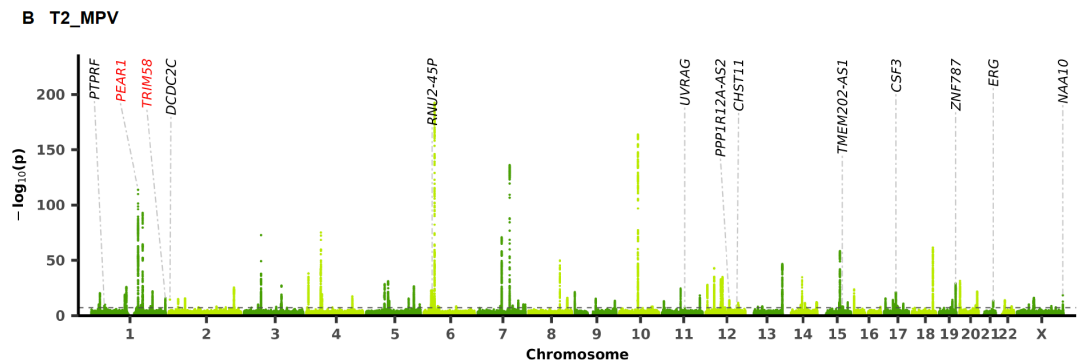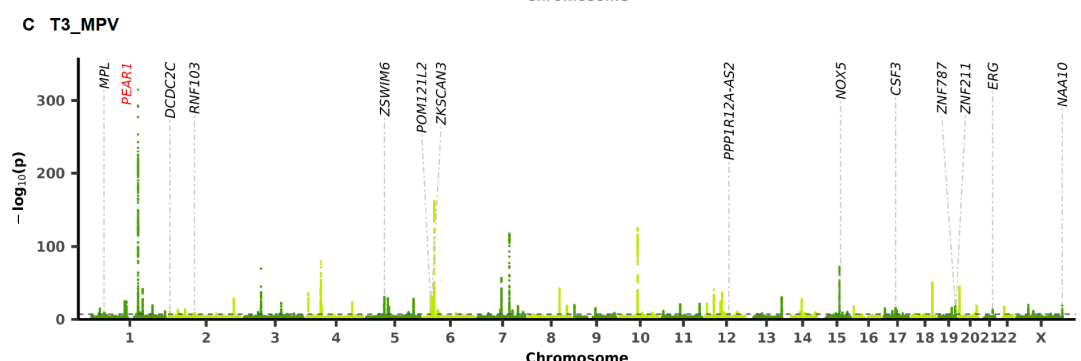

559

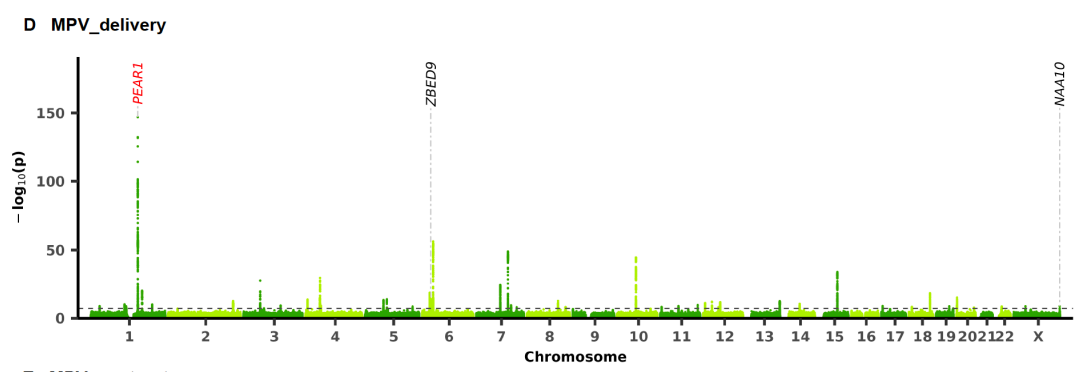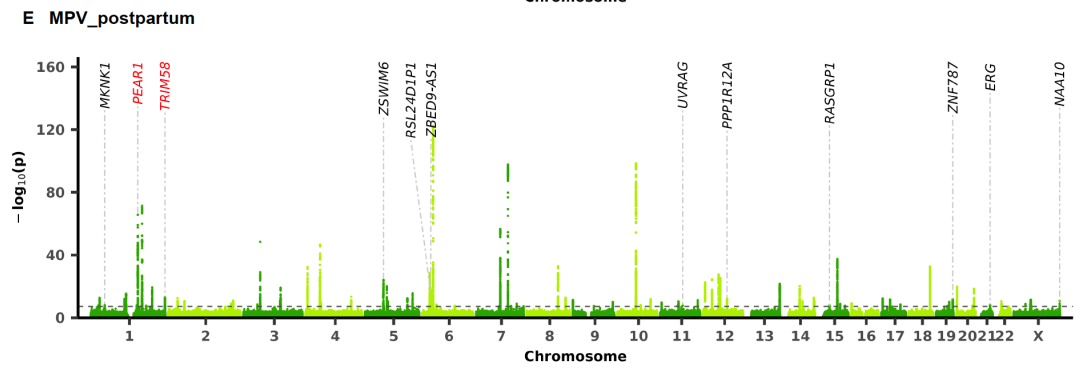

560



561 **Figure S21. Manhattan plots of the genome-wide association study meta-analyses for MPV**  
562 **during the first, second, and third trimesters, at delivery, and during the postpartum.** 71,605  
563 Chinese pregnant women with at least one MPV in each trimester from two hospitals were  
564 included in the GWAS meta-analyses. Manhattan plots for GWAS meta-analyses of platelet  
565 counts during (A) the first trimester, (B) the second trimester, and (C) the third trimester. A total  
566 of 138 genome-wide significant independent loci (187 independent signals) achieved the genome-  
567 wide significance threshold. GWASs of platelet count (D) at delivery and (E) during the  
568 postpartum period were undertaken with 30,313 and 54,914 Chinese pregnant women,  
569 respectively. A total of 39 and 82 genome-wide significant independent loci (46 and 89 signals)  
570 achieved the genome-wide significance threshold. GWAS for each hospital was carried out with a  
571 linear regression model, and the first to tenth principal components, maternal age, and gestation  
572 age correspond to the time of the platelet count test as covariates. The x-axis shows the ordered  
573 chromosomes and the y-axis indicates  $-\log_{10}(P\text{-value})$  for the association tests. The dashed black  
574 line represents the genome-wide significance threshold for GWAS ( $P = 5 \times 10^{-8}$ ). Labels in black  
575 indicate the nearest gene of the novel loci, and labels in red highlight the two loci (*PEAR1* and  
576 *TRIM58*) with time-dependent genetic effects during pregnancy. T1\_MPV: Mean platelet volume  
577 during the first trimester; T2\_MPV: Mean platelet volume during the second trimester; T3\_MPV:  
578 Mean platelet volume during the third trimester.  
579

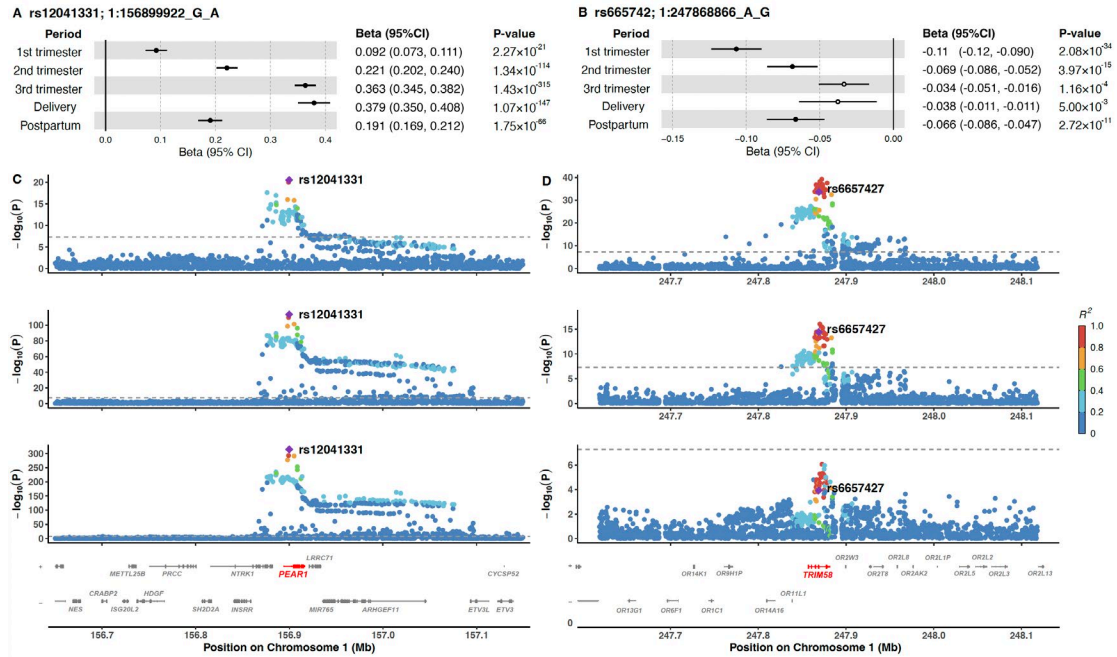

581

582 **Figure S22. Forest plots and regional association plots for two variants with time-dependent**583 **genetic effects for MPV during pregnancy.** Forest plots showing the genetic effect of (A)584 rs12041331-A allele at 1q23.1 (*PEAR1*) and (B) rs6657427-A allele at 1q44 (*TRIM58*) on meta-

585 analysis for platelet count during the first, second, and third trimester, at delivery, and during the

586 postpartum period. Points represent genetic effect (beta). Hollow points indicate a *P* value not587 reaching genome-wide significance ( $P = 5 \times 10^{-8}$ ). The error bars indicate the 95% confidence

588 interval of beta. Regional association plots from top to bottom represent the results of meta-

589 analyses for platelet count during the first, second, and third trimesters at (C) 1q23.1 (*PEAR1*) and590 (D) 1q44 (*TRIM58*). The x-axis shows the chromosomal positions (GRCh38) and the y-axis591 indicates  $-\log_{10}(P\text{-value})$  for the association tests. The purple diamond indicates the lead SNP of592 each locus. The other SNPs are colored based on their LD  $r^2$  with the lead SNP. The dashed grey593 line represents the genome-wide significance threshold for GWAS ( $P = 5 \times 10^{-8}$ ). The gene track

594 highlighted in red shows the nearest gene for the lead SNP.

595

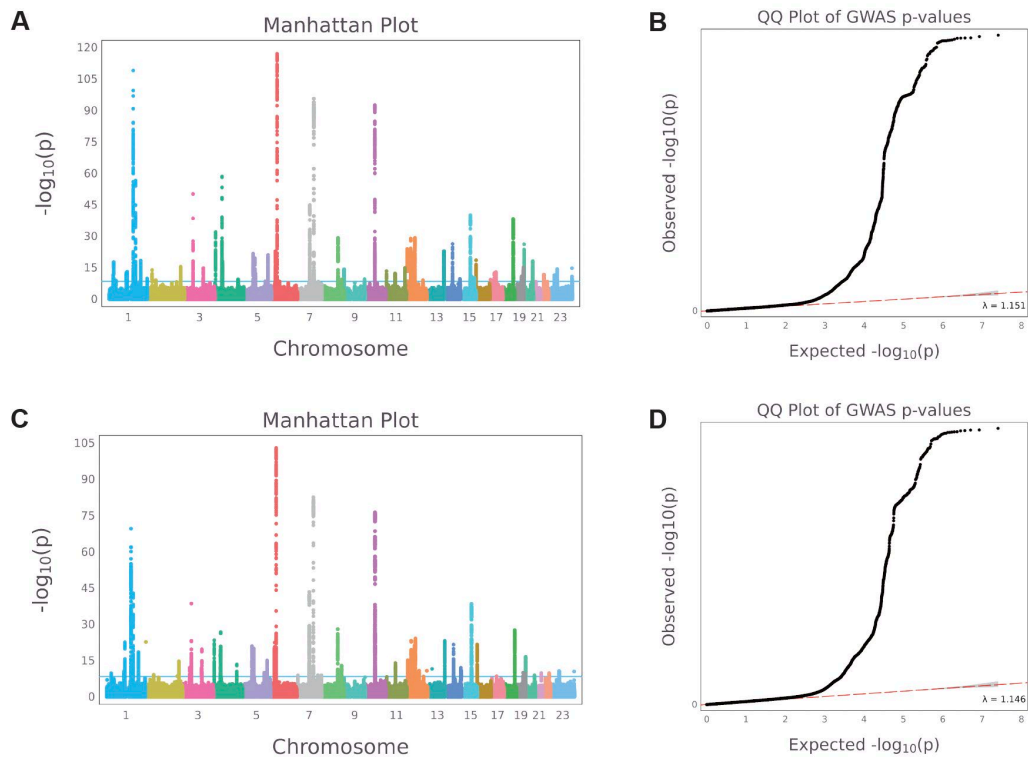

596

597 **Figure S23. TrajGWAS results of the mean of longitudinal MPV during pregnancy and the**  
 598 **postpartum period.**

599 74,013 pregnancies (Longgang:  $n = 39,546$ , Baoan:  $n = 34,467$ ) with more than one MPV during  
 600 pregnancy and the postpartum period were included in the TrajGWAS analyses. MPVs were rank-  
 601 based transformed. The first to tenth principal components, age, and gestation age corresponding  
 602 to the time of the MPV test were adjusted as covariates. Manhattan plots for (A) Longgang and  
 603 (C) Baoan. The x-axis shows the ordered chromosomes and the y-axis indicates  $-\log_{10}(P\text{-value})$   
 604 for the TrajGWAS analyses. The blue horizontal line represents the genome-wide significance  
 605 threshold ( $P = 5 \times 10^{-8}$ ). QQ plots for (B) Longgang and (D) Baoan show the observed  $-\log_{10}(P\text{-}$   
 606  $\text{value})$  in TrajGWAS analyses against expected  $-\log_{10}(P\text{-value})$ . The red dashed line indicates the  
 607 distribution of  $P$  values under the null hypothesis and the gray shaded area indicates standard  
 608 errors. MPV: mean platelet volume.

609

610

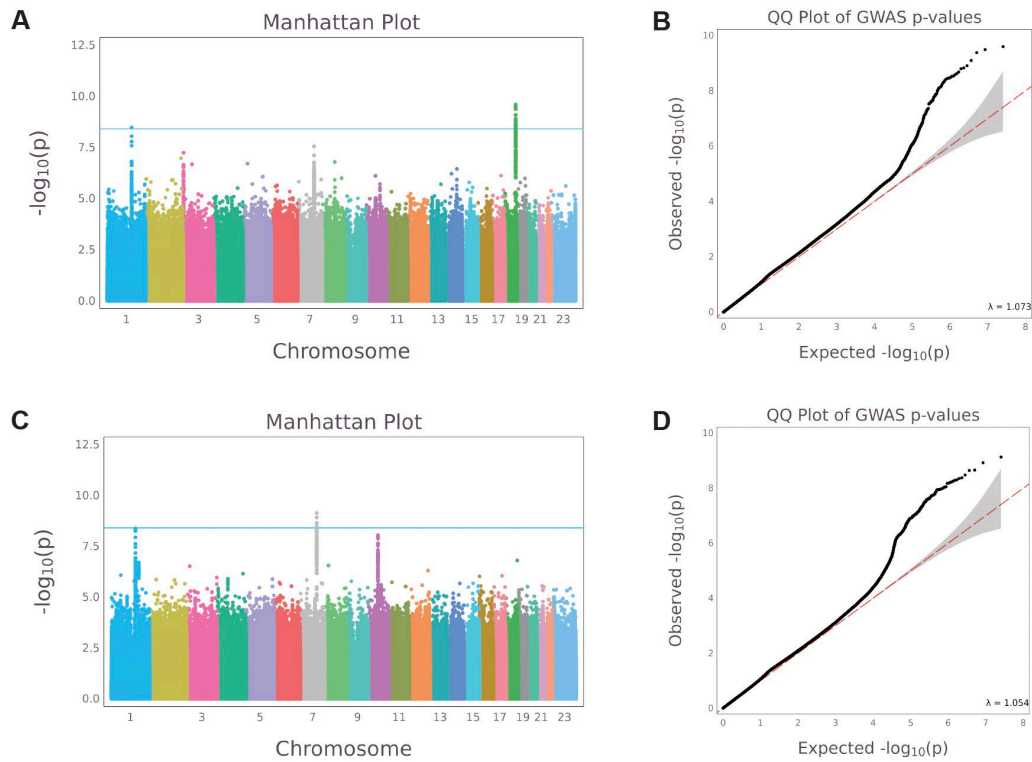

611

612 **Figure S24. TrajGWAS results of the within-subject variability of longitudinal MPV during**  
 613 **pregnancy and the postpartum period.**

614 74,013 pregnancies (Longgang:  $n = 39,546$ , Baoan:  $n = 34,467$ ) with more than one MPV during  
 615 pregnancy and the postpartum period were included in the TrajGWAS analyses. MPVs were rank-  
 616 based transformed. The first to tenth principal components, age, and gestation age corresponding  
 617 to the time of the MPV test were adjusted as covariates. Manhattan plots for (A) Longgang and  
 618 (C) Baoan. The x-axis shows the ordered chromosomes and the y-axis indicates  $-\log_{10}(P\text{-value})$   
 619 for the TrajGWAS analyses. The blue horizontal line represents the genome-wide significance  
 620 threshold ( $P = 5 \times 10^{-8}$ ). QQ plots for (B) Longgang and (D) Baoan show the observed  $-\log_{10}(P\text{-}$   
 621  $\text{value})$  in TrajGWAS analyses against expected  $-\log_{10}(P\text{-value})$ . The red dashed line indicates the  
 622 distribution of  $P$  values under the null hypothesis and the gray shaded area indicates standard  
 623 errors. MPV: mean platelet volume.
